1 **The centrosomal protein 83 (CEP83) regulates human pluripotent stem**  
2 **cell differentiation towards the kidney lineage**

3  
4 **Fatma Mansour<sup>1,2,3</sup>, Christian Hinze<sup>1,2,4,5</sup>, Narasimha Swamy Telugu<sup>4,6</sup>, Jelena**  
5 **Kresoja<sup>7</sup>, Iman B. Shaheed<sup>3</sup>, Christian Mosimann<sup>7</sup>, Sebastian Diecke<sup>4,5</sup>, Kai M.**  
6 **Schmidt-Ott<sup>1,2,5\*</sup>**

7 <sup>1</sup> Department of Nephrology and Medical Intensive Care, Charité–Universitätsmedizin Berlin, 12203 Berlin,  
8 Germany.

9 <sup>2</sup> Molecular and Translational Kidney Research, Max-Delbrück-Center for Molecular Medicine in the  
10 Helmholtz Association (MDC), 13125 Berlin, Germany

11 <sup>3</sup> Department of Pathology, Faculty of Veterinary Medicine, Cairo University, 12613 Giza, Egypt

12 <sup>4</sup> Berlin Institute of Health, Anna-Louisa-Karsch-Straße 2, 10178 Berlin, Germany

13 <sup>5</sup> Department of Nephrology and Hypertension, Hannover Medical School, 30625 Hannover, Germany

14 <sup>6</sup> Technology Platform Pluripotent Stem Cells, Max Delbrück Center for Molecular Medicine in the  
15 Helmholtz Association (MDC), Robert-Rössle-Str. 10, 13092 Berlin, Germany

16 <sup>7</sup> University of Colorado School of Medicine, Anschutz Medical Campus, Department of Pediatrics,  
17 Section of Developmental Biology, 12801 E 17th Avenue, Aurora, CO 80045, USA

18  
19 \*Correspondence: Prof. Dr. Kai M. Schmidt-Ott, Department of Nephrology and Medical Intensive Care,  
20 Charité–Universitätsmedizin Berlin, corporate member of Freie Universität Berlin, Humboldt-Universität  
21 Berlin, 12203 Berlin, Germany. [Kai.schmidt-ott@charite.de](mailto:Kai.schmidt-ott@charite.de)

22  
23  
24  
25  
26  
27  
28  
29  
30  
31  
32  
33  
34  
35

36

37

## 38 **Abstract**

### 39 **Background**

40 During embryonic development, the mesoderm undergoes patterning into diverse  
41 lineages including axial, paraxial, and lateral plate mesoderm (LPM). Within the LPM, the  
42 so-called intermediate mesoderm (IM) forms kidney and urogenital tract progenitor cells,  
43 while remaining LPM forms cardiovascular, hematopoietic, mesothelial and additional  
44 progenitor cells. The signals that regulate these early lineage decisions are incompletely  
45 understood. Here, we found that the centrosomal protein 83 (CEP83), a centriolar  
46 component necessary for primary cilia formation and mutated in pediatric kidney disease,  
47 influences the differentiation of human induced pluripotent stem cells (hiPSCs) towards  
48 intermediate mesoderm.

49

### 50 **Methods**

51 We induced inactivating deletions of *CEP83* in hiPSCs and applied a 7 day in vitro  
52 protocol of intermediate mesoderm kidney progenitor differentiation, based on timed  
53 application of WNT and FGF agonists. We characterized induced mesodermal cell  
54 populations using single cell and bulk transcriptomics and tested their ability to form  
55 kidney structures in subsequent organoid culture.

56

### 57 **Results**

58 While hiPSCs with homozygous *CEP83* inactivation were normal regarding morphology  
59 and transcriptome, their induced differentiation into IM progenitor cells was perturbed.

60 Mesodermal cells induced after 7 days of monolayer culture of *CEP83*-deficient hiPCS  
61 exhibited absent or elongated primary cilia, displayed decreased expression of critical IM  
62 genes (*PAX8*, *EYA1*, *HOXB7*) and an aberrant induction of LPM markers (e. g. *FOXF1*,  
63 *FOXF2*, *FENDRR*, *HAND1*, *HAND2*). Upon subsequent organoid culture, wildtype cells  
64 differentiated to form kidney tubules and glomerular-like structures, whereas *CEP83*-  
65 deficient cells failed to generate kidney cell types, instead upregulating cardiomyocyte,  
66 vascular, and more general LPM progenitor markers.

67

## 68 **Conclusion**

69 Our data suggest that *CEP83* regulates the balance of intermediate mesoderm and lateral  
70 plate mesoderm formation from human pluripotent stem cells, identifying a potential link  
71 between centriolar or ciliary function and mesodermal lineage induction.

72

73 **Keywords:** distal appendages; Centrosomal protein 83; kidney development;  
74 pluripotent stem cells; kidney organoids; primary cilium; CRISPR-cas9

75

76

77

78

79

80

## 81 **Introduction**

82           During mammalian embryonic development, the mesoderm forms axial, paraxial,  
83 and lateral plate domains that harbor precursor cells for distinct organ systems. Forming  
84 as a major part of the lateral plate mesoderm (LPM), the intermediate mesoderm (IM)  
85 harbors progenitor cells of all kidney epithelial cells<sup>1</sup>, whereas remaining LPM contributes  
86 progenitors of various cell types, including cells of the cardiovascular system<sup>2</sup>. The  
87 molecular and cellular mechanisms that drive induction of the IM and distinct LPM  
88 domains during embryonic development are not fully understood.

89           The centrosomal protein 83 (CEP83) is a component of distal appendages (DAPs) of  
90 centrioles. DAPs are involved in the anchoring of the mother centriole to the cell  
91 membrane, an early and critical step in ciliogenesis<sup>3-11</sup>. CEP83 recruits other DAP  
92 components to the ciliary base, and loss of CEP83 disrupts ciliogenesis<sup>4</sup>. In radial glial  
93 progenitors, removal of CEP83 disrupts DAP assembly, and impairs the anchoring of the  
94 centrosome to the apical membrane as well as primary ciliogenesis<sup>5,10</sup>. Mutations of  
95 CEP83 in humans have been associated with infantile nephronophthisis<sup>9</sup>, an early onset  
96 kidney disease that results in end stage renal disease before the age of 3 years<sup>12,13</sup> and  
97 additional organ anomalies<sup>9</sup>. To date, how loss of CEP83 function contributes to aberrant  
98 kidney development remains unclear.

99           Human induced pluripotent stem cells (iPSCs) provide useful tools to study  
100 molecular mechanisms of cellular differentiation. Protocols for the induction of kidney  
101 organoids from iPSC have been successfully developed<sup>14-19</sup>. The protocol by Takasato *et*  
102 *al.* uses stepwise exposure of iPSC to WNT and FGF agonists in a monolayer culture  
103 system for a 7 day period, which results in the induction of cells with a transcriptional

104 phenotype resembling kidney progenitors in the IM<sup>17</sup>. Transfer of these cells to an  
105 organoid culture system followed by another series of WNT and FGF signals results in  
106 differentiation of 3-dimensional kidney organoids composed of different kidney cells  
107 types, including glomerular and tubular cells. Genome editing studies have previously  
108 been used to study the effects of genetic defects associated with kidney diseases on  
109 kidney differentiation in human iPSC systems<sup>18,20-24</sup>. Here, we studied the effect of an  
110 induced knockout of *CEP83* in human iPSCs on kidney organoid differentiation. We  
111 uncovered a novel role of CEP83 in determining the balance of IM versus LPM  
112 differentiation, implicating a centrosomal protein in early mesodermal lineage decisions.

113

## 114 **Concise Methods**

### 115 **hiPSCs cell line.**

116 We used the human iPSC cell line BIHi005-A, which was generated by the Berlin Institute  
117 of Health (BIH). The hiPSCs were maintained in 6-well plates (Corning®, 353046) coated  
118 with Matrigel (Corning®, 354277) and cultured in Essential 8 medium (E8, A1517001,  
119 Gibco-Thermo Fisher Scientific) supplemented with 10µM Y-27632 (Rocki, Wako, 253-  
120 00513).

### 121 **CRISPR CAS9 Technology to generate *CEP83*<sup>-/-</sup> hiPSCs clones.**

122 Clustered Regularly Interspaced Short Palindromic Repeats (CRISPR)-Cas9 technology  
123 was used to generate *CEP83*<sup>-/-</sup> hiPSCs clones. We designed two CRISPR RNAs  
124 (crRNAs) (5'-GGCTGAAGTAGCGGAATTAA-AGG-3' and 5'-  
125 AAGAATACAGGTGCGGCAGT-TGG-3') using CRISPOR software<sup>25</sup>. The two crRNAs

126 were annealed with trans-activating CRISPR RNA (tracrRNA) to form two guide RNAs  
127 (gRNA1 and gRNA2) and then formed a RNP complex by incubating gRNA1 and gRNA2  
128 separately with Alt-R® S.p. Cas9 Nuclease V3 (1  $\mu$ M concentration, IDT, 1081058). The  
129 hiPSCs were transfected with RNP complexes using Neon transfection system (Thermo  
130 Fisher Scientific, MPK5000)<sup>26</sup> and Neon™ transfection 10  $\mu$ l kit (Thermo Fisher Scientific,  
131 MPK10025) according to the manufacturer's instructions. After 48hrs of transfection, we  
132 analyzed the editing efficiency in the pool by PCR genotyping.

133 For PCR genotyping, we isolated genomic DNA from the pool of transfected cells followed  
134 by PCR using Phire™ Tissue Direct PCR Master Mix (Thermo Scientific, F170S)  
135 according to the manufacturer's instructions (**Figure 1B**). After confirming the editing  
136 efficiency in the pool, we generated single cell clones by the clonal dilution method. We  
137 plated 500 single cells per well of a 6 well plate and picked 24 clones using a picking hood  
138 S1 (Max Delbrück Centre Stem Cell Core Facility). Then, clones were screened for  
139 homozygous deletions of *CEP83* by PCR using Phire™ Tissue Direct PCR Master Mix.  
140 Selected knockout clones were further characterized for *CEP83* loss of function on the  
141 DNA, RNA, and protein level. *CEP83*<sup>-/-</sup> clones (*KO1*, *KO2*, and *KO3*) were registered as  
142 (BIHi005-A-71, BIHi005-A-72, and BIHi005-A-73) in the European Human Pluripotent  
143 Stem Cell Registry (<https://hpscereg.eu>).

#### 144 **Single nucleotide polymorphism (SNP)- Karyotype**

145 To assess karyotype integrity, copy number variation (CNV) analysis on the human  
146 Illumina OMNI-EXPRESS-8v1.6 BeadChip was used. In brief, genomic DNA was isolated  
147 from three *WT* (*WT1*, *WT2*, and *WT3*) and three *KO* (*KO1*, *KO2* and *KO3*) clones using  
148 the DNeasy blood and tissue kit (Qiagen, Valencia, CA, United States), hybridized to the

149 human Illumina OMNI-EXPRESS-8v1.6 BeadChip (Illumina), stained, and scanned using  
150 the Illumina iScan system according to a standard protocol<sup>27-29</sup>. The genotyping was  
151 initially investigated using the GenomeStudio 1 genotyping module (Illumina). Following  
152 that, KaryoStudio 1.3 (Illumina) was used to perform automatic normalization and identify  
153 genomic aberrations in detected regions by generating B-allele frequency and smoothed  
154 Log R ratio plots. To detect copy number variations (CNVs), the stringency parameters  
155 were set to 75 kb (loss), 100 kb (gain), and CN-LOH (loss of heterozygosity). KaryoStudio  
156 generates reports and displays chromosome, length, list of cytobands, and genes in CNV-  
157 affected regions.

158

### 159 **Differentiation Protocol.**

160 We used the protocol of *Takasato* to differentiate the hiPSCs into nephron organoids<sup>17</sup>.  
161 Briefly, hiPSCs were cultured firstly in APEL2 medium (Stem Cell Technologies, 05270)  
162 supplemented with 5% Protein Free Hybridoma Medium II (PFHMII, GIBCO, 12040077),  
163 and 8  $\mu$ M CHIR99021 (R&D, 4423/10) for 5 days, with medium changes every 2 days.  
164 Then, the cells were cultured in APEL2 medium supplemented with 200 ng/ml FGF9  
165 (R&D, 273-F9-025) and 1  $\mu$ g/ml heparin (Sigma Aldrich, H4784-250MG) for 2 days. On  
166 day 7, the cells were washed with 1X Dulbecco's PBS (DPBS, Thermo Fisher  
167 Scientific, 14190-250), then trypsinized using trypsin EDTA-0.05% (Thermo Fisher  
168 Scientific, 25300-062) at 37 °C for 3 min. The cells were counted and divided to achieve  
169  $1 \times 10^6$  cells per organoid and cultured into 3D organoid culture on 0.4- $\mu$ m-pore polyester  
170 membrane of Corning 6-well Transwell cell culture plate (Corning-Sigma Aldrich,  
171 CLS3450-24EA). Four to five organoids were seeded on one membrane using a P100

172 wide-bore tip, and cultured in APEL2 with 5  $\mu$ M CHIR99021 at 37°C for 1h (CHIR99021  
173 pulse). After the CHIR pulse, we changed the medium to APEL2 medium supplemented  
174 with 200 ng/ml FGF9 + 1  $\mu$ g/ml heparin for 5 days with medium refreshing every 2d. The  
175 organoids were then cultured only in APEL2 medium with 1  $\mu$ g/ml heparin for additional  
176 13 days. The total differentiation time is 25 days (7+18).

#### 177 **DNA isolation and Polymerase Chain Reaction (PCR).**

178 DNA was isolated from cells using DNeasy Blood & Tissue Kits (Qiagen, 69504). CEP83  
179 primers were designed using Primer3 webtool (Table S1). PCR was done using Phusion  
180 high-fidelity DNA polymerase (Biolabs, New England, M0530) according to the  
181 manufacturer's instructions. PCR results were visualized on 1.5% agarose gel using a  
182 BioDoc Analyze dark hood and software system (Biometra).

#### 183 **RNA isolation, RNA Sequencing, and Quantitative PCR (qPCR).**

184 Total RNA was isolated from the cells using RNAasy Mini Kit (QIAGEN, Hilden, Germany,  
185 74104) following the manufacture instructions. The concentration, quality, and integrity of  
186 the extracted RNA were evaluated using Nanodrop (Thermo Scientific, Waltham, MA;  
187 USA), an Agilent 2100 Bioanalyzer, and the Agilent RNA 6000 Nano kit (Agilent  
188 Technologies, 5067-1511). 0.4  $\mu$ g total RNA was used to obtain a poly A–enriched RNA  
189 library by Novogene (Cambridge, United Kingdom). Library concentration was performed  
190 using a Qubit fluorometer (HS RNA assay kit, Agilent Technologies). Library size was  
191 measured by Agilent 2100 bioanalyzer. The libraries were then subjected to 150-bp  
192 paired-end next-generation sequencing (Illumina NovaSeq 6000 S4 flow cells). Mutation  
193 visualization was performed using the Integrative Genomic Viewer (IGV) tool<sup>30</sup>. Read



194 counts of the sequenced RNA were normalized to Transcripts Per Million (TPM). The  
195 TPM values of the variables were used to plot heatmaps and for principle cell analysis  
196 (PCA) based on Pearson correlation, using self-written scripts in R (R Development Core  
197 Team (2011)) (version 4.0.4).

198 RNA was reverse transcribed using the RevertAid First Strand cDNA Synthesis Kit  
199 (Thermo Scientific). qPCR was performed using the FastStart Universal SYBR Green  
200 Master (Rox) mix (Hoffmann-La Roche) according to the manufacturer's instructions.  
201 Glyceraldehyde-3-Phosphate Dehydrogenase (*GAPDH*) mRNA expression and  
202 calculated according to the  $\Delta\Delta C_t$  method. All primer pairs were designed using Primer3,  
203 purchased at BioTeZ (Berlin, Germany), and sequences are shown in (Table S1).

#### 204 **Single cell RNA sequencing (scRNA-seq)**

##### 205 **Cells isolation and preparation**

206 Differentiated cells at day 7 were washed twice with 1X DPBS, dissociated with Accumax  
207 solution, and resuspended in 1X DPBS. Then, cells were filtered, counted, and checked  
208 for viability.

##### 209 **Library preparation and single cell sequencing**

210 Single cell 3' RNA sequencing was performed using the 10x Genomics toolkit version  
211 v3.1<sup>31</sup> according to the manufacturer's instructions aiming for 10000 cells. Obtained  
212 libraries were sequenced on Illumina NextSeq 500 sequencers.

##### 213 **Single-Cell Sequencing Data analysis and Clustering**

214 After sequencing and demultiplexing, fastq files were analyzed using Cellranger version  
215 3.0.2. Gene expression matrices were then imported in R and Seurat objects were  
216 created using the Seurat R package (version 4.0.5)<sup>32</sup>. The gene expression matrices were  
217 initially filtered by applying lower and upper cut-offs for the number of detected genes  
218 (500 and 6000, respectively). The filtered data were then log normalized and scaled  
219 according to the number of unique molecular identifiers (UMIs). The normalized and  
220 scaled data derived from the four samples were then merged into one Seurat object.  
221 Clustering was performed using the first 20 principal components. We used the Seurat  
222 FindAllMarkers function to extract marker gene lists that differentiate between clusters  
223 with log fold-change threshold  $\pm 0.25$  using only positive marker expressed in a minimum  
224 of 25 % of cells. Principal component analysis (PCA) was done using the first 20 principle  
225 components in R using the following libraries factoextra, FactoMineR, and ggplot2.

## 226 **Protein extraction and Immunoblotting**

227 Proteins were extracted from hiPSCs using radioimmunoprecipitation assay (RIPA) buffer  
228 (Sigma-Aldrich, R0278) as described in details in supplementary data. 30  $\mu$ g protein in  
229 RIPA buffer were mixed with 1x reducing (10% b-mercaptoethanol) NuPAGE loading  
230 buffer (Life Technologies, Carlsbad, CA), loaded on a precast polyacrylamide NuPage 4-  
231 12% Bis-Tris protein gel (Invitrogen, Carlsbad, CA, USA), and blotted on 0.45  $\mu$ m pore  
232 size Immobilon-P Polyvinylidene difluoride (PVDF) membrane (EMD Millipore, Billerica,  
233 MA; USA). The membrane was blocked in 5% bovine serum albumin for 1 h at room  
234 temperature and incubated overnight at 4°C with primary antibodies: Anti-CEP83  
235 produced in rabbit (1:500, Sigma-Aldrich) and Anti- $\alpha$ -Tubulin produced in mouse (1:500,  
236 Sigma-Aldrich, T9026). Then, the membrane was incubated for 1 h at room temperature

237 with horseradish peroxidase-conjugated secondary antibodies (1:2000, Sigma-Aldrich,  
238 Saint Louis, MO, USA). Chemiluminescent reagent (Super Signal–West Pico; Thermo  
239 Scientific, Waltham, MA; USA) was used to detect the proteins. The spectra™ Multicolor  
240 Broad Range Protein Ladder (Thermo Fisher Scientific, USA) was used to evaluate the  
241 molecular weight of corresponding protein bands.

## 242 **Histology and Immunofluorescence (IF) staining**

243 Cells at different time points were checked regularly under confocal microscope (Leica  
244 DMI 6000 CEL) for differentiation progress. Quantitative analysis of nephron-like  
245 structure formation within each organoid (D25) were done on tile scanning images of each  
246 organoid by estimating the percentage of the organoid area composed of nephron-like  
247 structures using 13 WT and 9 KO organoids. Organoids were fixed in BD Cytfix buffer  
248 (554655, BD Biosciences) for 1 hour on ice. Then organoids were gradually dehydrated  
249 in increasing ethanol concentrations, cleared in xylene, and embedded in paraffin.  
250 Organoids were cut into 3.5 µm-thick sections. The sections were deparaffinized,  
251 dehydrated, and stained in hematoxylin (Sigma-Aldrich, Saint Louis, MO) for 3 minutes  
252 and in 1% eosin (Sigma-Aldrich) for 2 minutes. For immunostaining, organoids were fixed  
253 with BD Cytfix, permeabilized with BD Perm/Wash (554723, BD Biosciences), and  
254 blocked with blocking solution (1% BSA + 0.3% triton-X-100 in 1X DPBS) for 2 h. Cells  
255 were incubated overnight at 4°C with primary antibodies (table S2), then incubated with  
256 fluorescence-labeled secondary antibodies with 1:500 dilution including Cy3, Cy5,  
257 Alexa488, and Alexa647 (Jackson ImmunoResearch, Newmarket, UK) and Cy3  
258 Streptavidin (Vector lab, Burlingame, USA) overnight at 4°C. DAPI was then used for  
259 nuclear staining (Cell signaling Technology, Danvers, MA, USA) with 1:300000 dilution

260 for 1 hour at RT. Finally, cells were mounted with Dako fluorescent mounting medium  
261 (Agilent Technologies). Images were taken using a SP8 confocal microscope (Carl Zeiss  
262 GmbH, Oberkochen, Germany). Quantitative analyses of acquired images were  
263 performed using ImageJ software (1.48v; National Institutes of Health, Bethesda, MD).

#### 264 **Comparison to zebrafish lateral plate mesoderm (LPM)**

265 The upregulated genes in *CEP83*<sup>-/-</sup> cells at day 7 and at day 25 were compared with the  
266 top 20 orthologous genes identified in subclusters of zebrafish LPM identified by scRNA-  
267 seq (Prummel et al., 2022), as deposited on ArrayExpress ([E-MTAB-9727](#))<sup>33</sup>.

#### 268 **Statistical analysis**

269 scRNA-seq was done on two biological replicates representing two different clones of  
270 *CEP83*<sup>-/-</sup> and control cells, respectively. All other experiments were performed using  
271 three biological replicates representing three independent clones of *CEP83*<sup>-/-</sup> and control  
272 cells at different time points. A common excel sheet for the genes present in both bulk  
273 RNA and scRNA sequencing were generated in R. The sheet includes in total 20894  
274 genes and represents the TPM values of both groups (*WT* and *KO*) on day 0, day7, day  
275 25 of differentiation. The maximal TPM (TPMmax) and the minimum TPM (TPMmin) were  
276 calculated for each gene across all samples. Highly variable genes (HVGs) were  
277 calculated based on the ratio of TPMmax and TPMmin. For heatmaps and PCA analysis,  
278 the top 1000 HVGs were plotted with selection of TPMmax >2 for each gene. Deregulated  
279 (upregulated and downregulated) genes between *WT* and *KO* groups were selected with  
280 expression criteria of TPM >2, fold change > 1.5, and *P*-value calculated on log<sub>10</sub> TPM  
281 < 0.05. The unpaired 2-tailed t-test was used to compare two groups. All graphs were

282 generated using GraphPad Prism 7.04 (GraphPad Software, San Diego, CA). Data are  
283 presented as mean  $\pm$  SD.

## 284 **Results**

### 285 **CEP83 is essential for the differentiation of human induced pluripotent stem cells** 286 **into kidney cells**

287 To investigate the effect of *CEP83* loss on the differentiation of hiPSCs into intermediate  
288 mesoderm (IM) kidney progenitors, we applied CRISPR-Cas9 technology to induce a null  
289 mutation in the *CEP83* gene in hiPSCs (**Figure 1A**). Three hiPSCs clones designated  
290 *CEP83*<sup>-/-</sup> (*KO1*, *KO2*, and *KO3*) carried deletions within *CEP83* exon 7, each of which led  
291 to an induction of a premature stop codon resulting in a predicted truncated protein  
292 (**Figure 1 B-D and Figure 1- figure supplement 1A**). These clones exhibited a complete  
293 loss of CEP83 protein by immunoblotting (**Figure 1 E**). Three wildtype clones were  
294 derived as controls (*WT1*, *WT2*, and *WT3*). All six clones were morphologically  
295 indistinguishable (by brightfield microscopy), and had similar overall gene expression  
296 profiles (by bulk RNA-seq and qRT-PCR), including pluripotency and lineage marker  
297 expression (**Figure 1- figure supplement 1B, C, and Figure 1- figure supplement 2A,**  
298 **B**). In KO clones, the anticipated altered transcripts of CEP83 were detectable based on  
299 bulk RNA-seq (data not shown). Single nucleotide polymorphism (SNP) - analysis  
300 confirmed identical karyotypes of all six clones (**Figure 1- figure supplement 2C**).

301 Together, these findings confirmed successful deletion of CEP83 in iPSCs without any  
302 overt direct cellular phenotypic consequences. We applied a 7 day monolayer protocol

303 using timed application of WNT and FGF agonists as reported by Takasato et al<sup>17</sup> to  
 304 differentiate *WT* and *KO* hiPSCs into IM kidney progenitors<sup>14-16</sup> (**Figure 2A**).

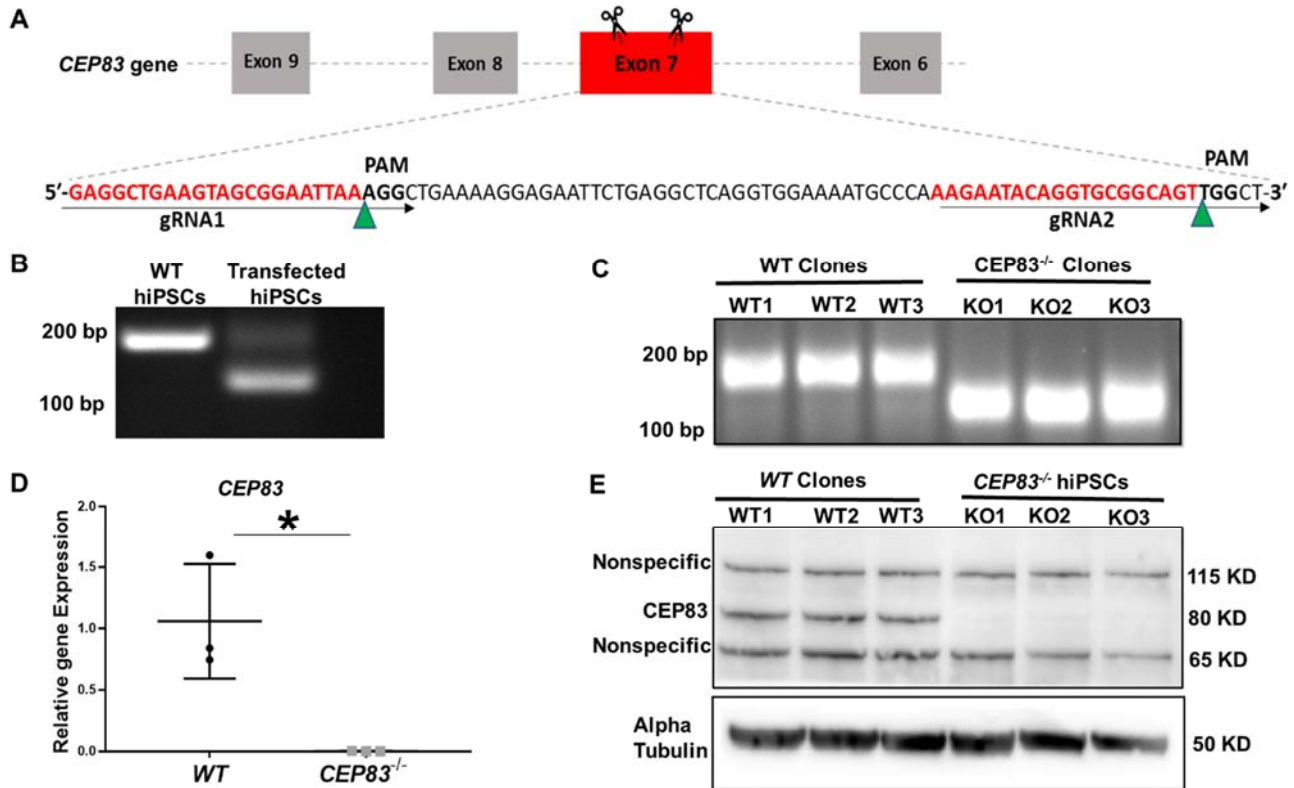

305 **Figure 1: Generation of CEP83-deficient human pluripotent stem cells.** (A) Schematic diagram of the  
 306 experimental approach to induce a deleting mutation in exon 7 of the *CEP83* gene. Two guide RNAs  
 307 (gRNAs) were designed to induce an approximately 63 bp deletion within exon 7 of the *CEP83* gene after  
 308 non-homologous end joining. (B) Ribonucleoprotein (RNP) complex containing crispr RNAs (crRNAs),  
 309 trans-activating crRNA (tracrRNA), and Cas9 endonuclease was transfected into hiPSCs by  
 310 electroporation. DNA extracted from pooled transfected cells was subjected to PCR targeting the predicted  
 311 deletion site in the *CEP83* gene. In addition to the 182 bp fragment present in untransfected wildtype (WT)  
 312 cells, an approximately 120 bp fragment was detected in transfected cells, corresponding to the induced  
 313 deletion in exon 7. Twenty-four single IPS cell-derived clones from these transfected cells were picked and  
 314 cultured. (C) Three of these clones (*CEP83*<sup>-/-</sup> clones *KO1*, *KO2*, *KO3*) carried 62-74b bp deletions within  
 315 *CEP83* exon 7, which led to an induction of premature stop codons or frameshift mutation on both alleles  
 316 of *CEP83*. Three wildtype clones (*WT1*, *WT2*, and *WT3*) were used as controls. (D) Quantitative RT-PCR

317 for a fragment corresponding to the deleted region in *CEP83* exon 7 produced a detectable signal in RNA  
318 extracts from WT clones but not *CEP83*<sup>-/-</sup> clones. (E) Immunoblotting of *WT* and *CEP83*<sup>-/-</sup> clones using a  
319 *CEP83* antibody targeting the C-terminal region of the protein (see methods for details) indicated a  
320 complete loss of the 83 kDa band corresponding to *CEP83* protein in the three *KO* clones compared with  
321 the three *WT* clones. Data are mean ± SD. \**P* < 0.05 and \*\**P* < 0.01 vs. *WT*. See Figure 1- source data 1-  
322 2. See also Figure 1—figure supplements 1–2.

323 After 7 days of culture (D7), *WT* and *KO* cells exhibited an indistinguishable morphology  
324 by bright field microscopy (**Figure 2B, C**). Immunostaining for acetylated tubulin,  
325 however, indicated abnormal primary cilia formation in *CEP83*-deficient cells (**Figure 2D,**  
326 **E**). The number of ciliated cells was reduced from approximately 30% (in *WT* clones) to  
327 less than 10% (in *KO* clones) (**Figure 2F**). Among ciliated cells, the length of cilia was  
328 increased from 2-5 μm (in *WT* clones) to 5-13 μm (in *KO* clones) (**Figure 2G**). This  
329 indicated that *CEP83*<sup>-/-</sup> hiPSCs differentiated towards IM progenitors exhibited ciliary  
330 abnormalities. To analyze the induced IM kidney progenitor cells functionally, we  
331 collected D7 *WT* and *CEP83*<sup>-/-</sup> cells and placed them into an organoid culture system  
332 again applying timed WNT and FGF agonists to foster differentiation of mature kidney cell  
333 types, as previously reported<sup>17</sup> (**Figure 2A**). Organoids harvested from *WT* clones after  
334 a total of 25 days of culture (D25) had formed patterned kidney epithelial-like structures,  
335 including NPHS1-positive glomerulus-like structures, Lotus tetragonolobus lectin (LTL)-  
336 positive proximal tubule-like, and E-cadherin (E-cad)-positive distal tubule-like structures  
337 (**Figure 3A, C, E**). In contrast, *CEP83*<sup>-/-</sup> organoids at day 25 were composed of  
338 monomorphic cells with a mesenchyme-like appearance, which stained negative for an  
339 array of kidney cell markers (**Figure 3B, D, and F**).

340



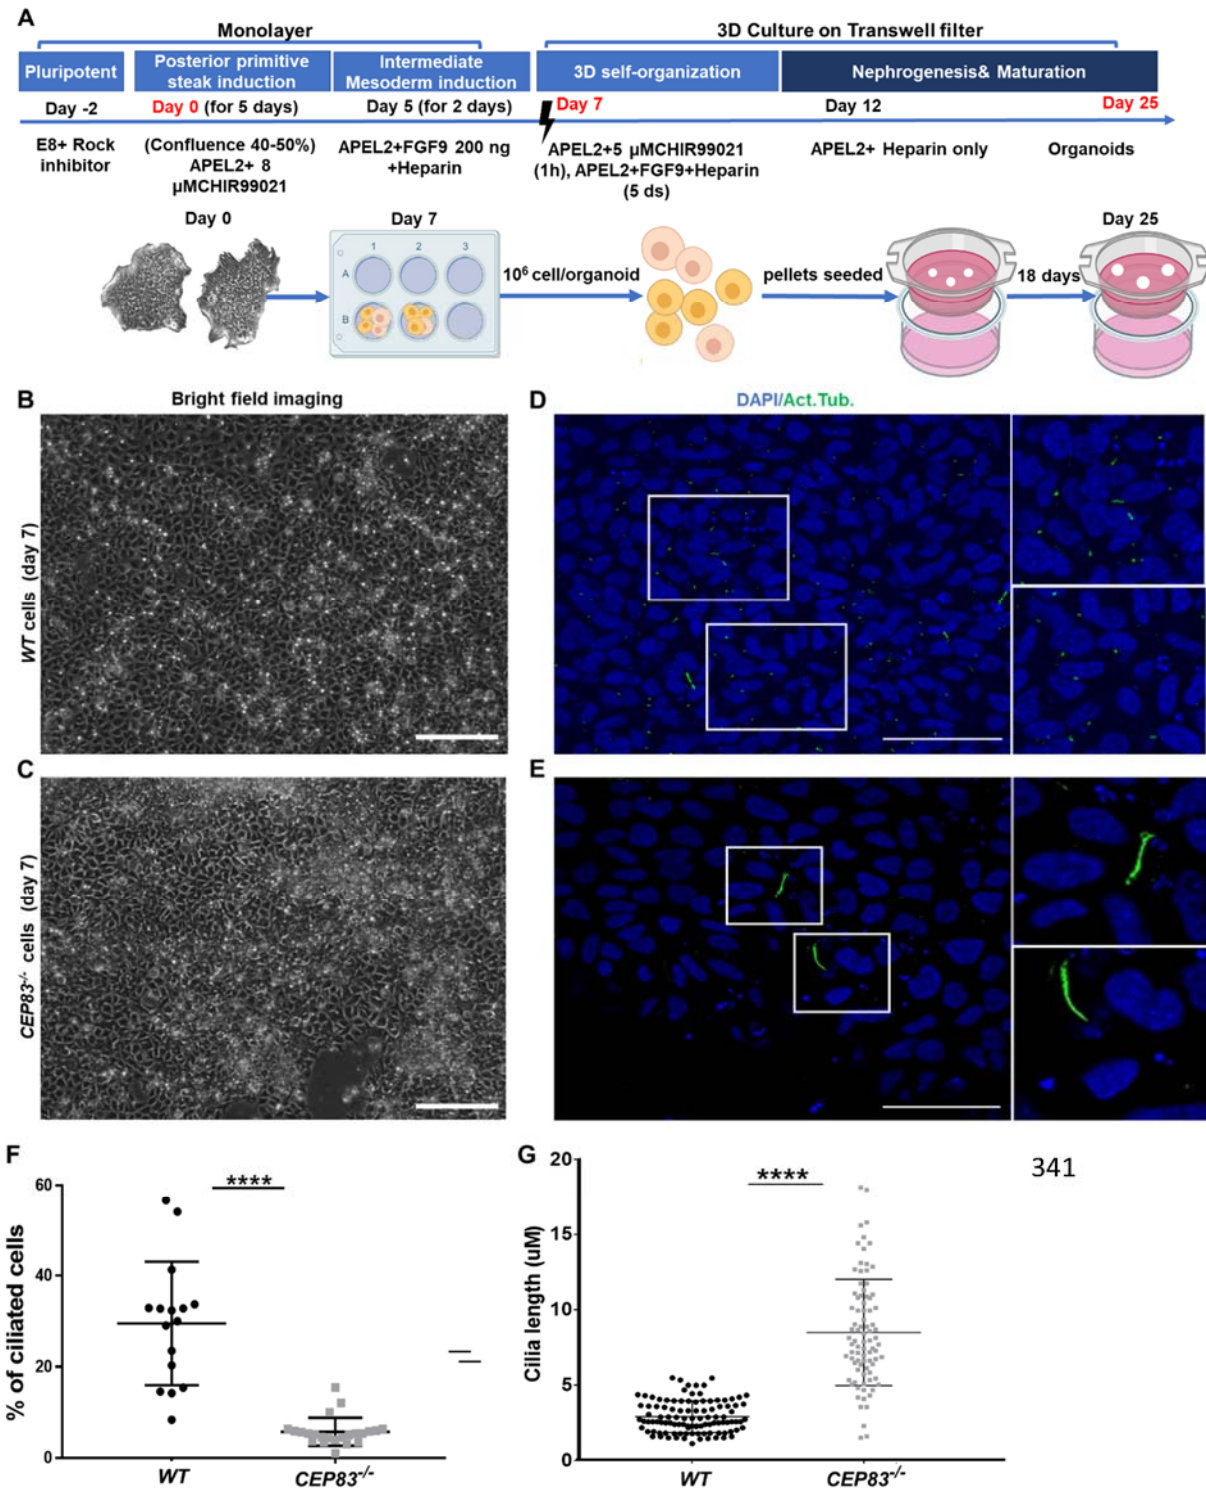

345 **Figure 2: Differentiation of CEP83<sup>-/-</sup> hiPSCs to intermediate mesoderm cells (day 7) is associated**  
 346 **with defective ciliogenesis.** (A) The schematic diagram illustrates the applied differentiation protocol of  
 347 hiPSCs, as previously described by Takasato *et al.*<sup>34</sup>. (B-C) WT and CEP83<sup>-/-</sup> cells on D7 of differentiation



348 did not show overt morphological differences by brightfield microscopy. (D-E) Representative images of *WT*  
349 and *CEP83*<sup>-/-</sup> cells on D7, immunostained for acetylated tubulin (green) and nuclei (DAPI, blue), revealing  
350 fewer and elongated cilia in *CEP83*<sup>-/-</sup> cells. (F) Quantitative analysis of the percentage of ciliated cells in  
351 *WT* and *CEP83*<sup>-/-</sup> cells (D7). (G) Quantitative analysis of the ciliary length in *WT* and *CEP83*<sup>-/-</sup> cells (D7). n  
352 = 3 clones per group. \*\*\*\**P* < 0.0001. Bar = 50 μm. See Figure 2- figure supplement 1.

353

354 Kidney epithelial-like structures formed only in *WT*, but not in *CEP83*<sup>-/-</sup> organoids (**Figure**  
355 **3G**). Similar to the findings in day 7 cells reported above, primary cilia were found in fewer  
356 cells of *CEP83*<sup>-/-</sup> organoids (<5% of cells) and were abnormally elongated (**Figure 2-**  
357 **figure supplement 1**).

358 Next, bulk RNA sequencing of *WT* (*WT1*, *WT2*, *WT3*) and *CEP83*<sup>-/-</sup> (*KO1*, *KO2*, *KO3*)  
359 organoids was carried out to evaluate differential gene expression on a genome-wide  
360 level, and RT-PCR was used to validate selected genes. Hierarchical clustering of the  
361 samples indicated strong gene expression differences between *WT* and *CEP83*<sup>-/-</sup> samples  
362 (**Figure 3- figure supplement 1**). Several genes associated with kidney development  
363 and kidney epithelial differentiation were differentially expressed with high expression in  
364 *WT* organoids, but showed comparatively low or absent expression in *CEP83*<sup>-/-</sup> organoids:  
365 these genes included kidney-specific lineage genes (*PAX2*, *PAX8*), and  
366 lineage/differentiation markers of glomerular cells (*NPHS1*, *PODXL*, *WT1*, *PTPRO*),  
367 proximal (*HNF1B*, *LRP2*, *CUBN*) and distal (*EMX2*, *MAL2*, *EPCAM*, *GATA3*) kidney  
368 epithelial cells. (**Figure 3H-L**, **Figure 3- figure supplement 1B-H**, and **Figure 3- figure**  
369 **supplement 2**). This indicated that *CEP83*<sup>-/-</sup> IM progenitors failed to differentiate into  
370 kidney cells, suggesting that *CEP83* function is necessary to complete essential steps in  
371 the process of differentiation from pluripotent stem cells to kidney cells.

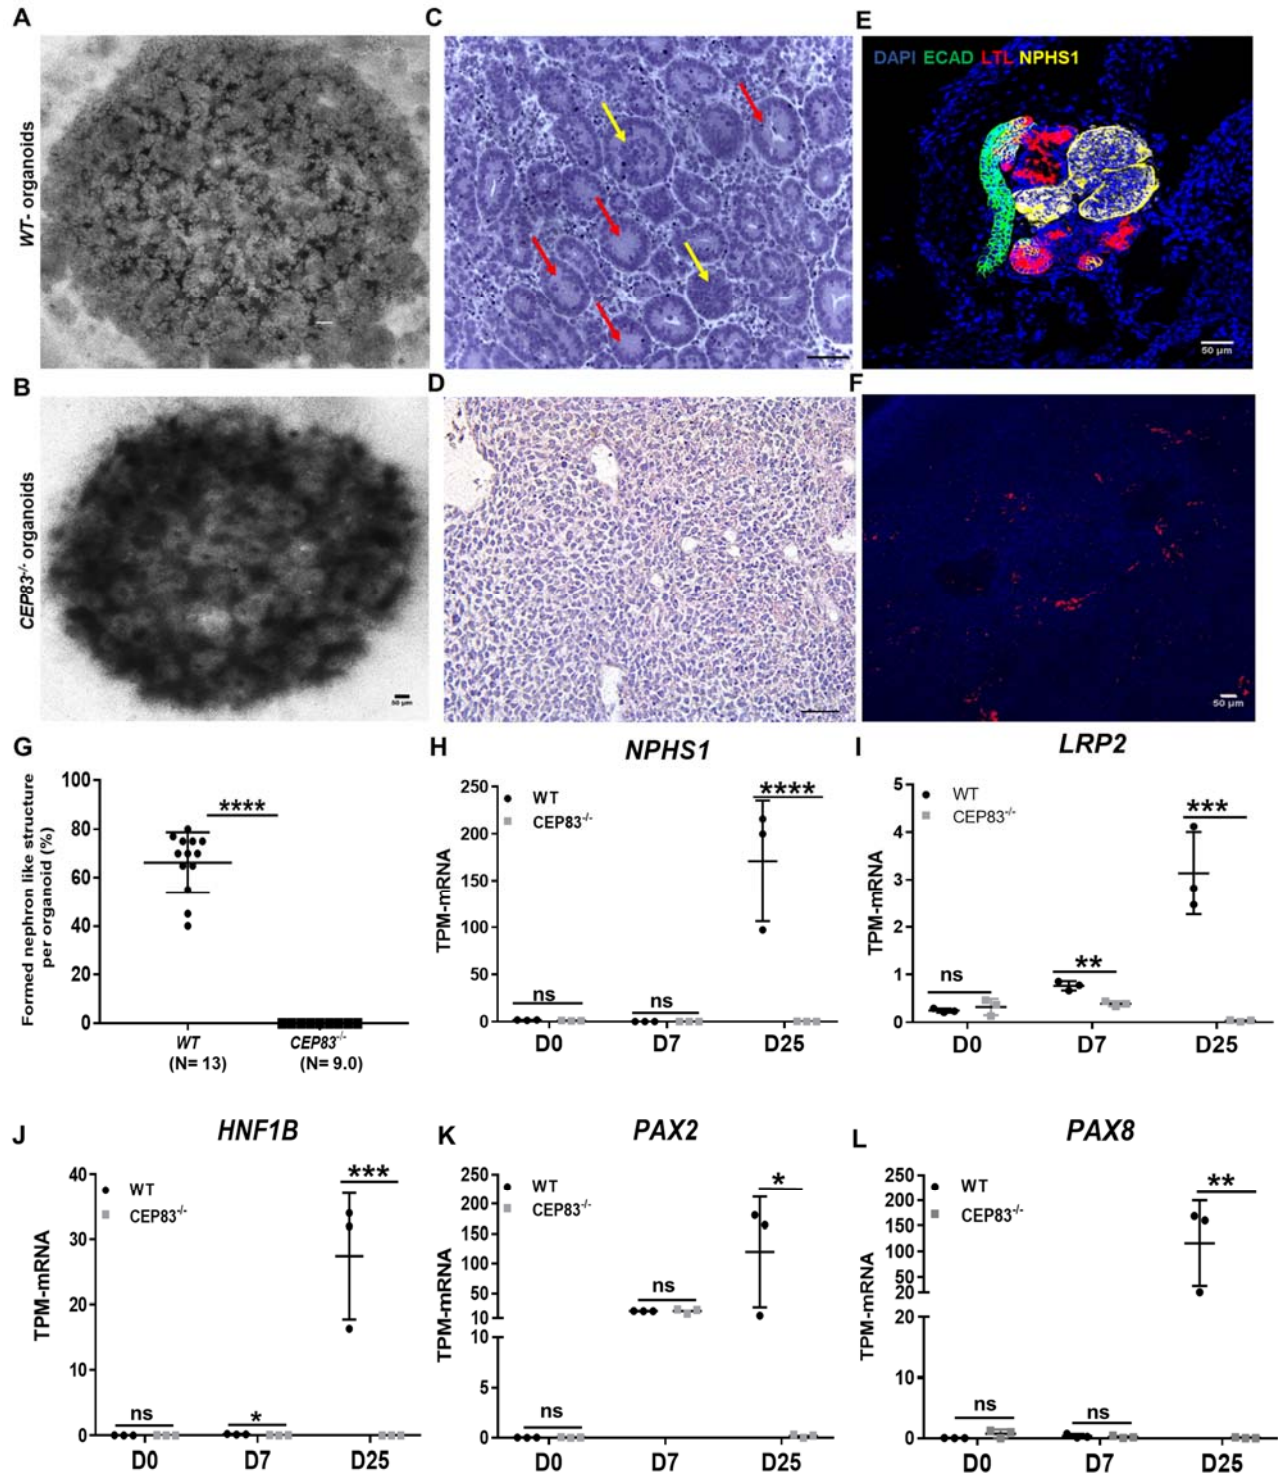

372 **Figure 3: Defective kidney organoid differentiation from CEP83-deficient pluripotent stem cells.** (A,  
 373 B) Bright-field images of organoids after a total of 25 days of culture (D25) indicate formation of multiple  
 374 kidney-like structures in WT organoids (A), whereas CEP83<sup>-/-</sup> organoids are composed of uniform clusters  
 375 (B). (C, D) Representative images of hematoxylin-eosin (HE)-stained sections of organoids. WT organoids

376 (C) display glomerulus-like (yellow arrows) and tubular (red arrow) components, whereas *CEP83*<sup>-/-</sup>  
377 organoids (D) are composed of monomorphic mesenchymal-like cells. (E-F) Whole mounting  
378 immunostaining of organoids for NPHS1 (podocyte marker), LTL (proximal tubule marker), and CDH1  
379 (distal tubule marker) indicate segmented nephron-like structures in *WT* organoids (E) and absence of such  
380 structures in *CEP83*<sup>-/-</sup> organoids (F). (G) Quantitative analysis of brightfield images indicating the estimated  
381 percentage of organoid area composed of nephron like structures, organoids were collected from three  
382 different experiments. (H-L) Gene expression (transcripts per million, TPM) of *NPHP1* (H), *LRP2* (I), *HNF1B*  
383 (J), *PAX2* (K) and *PAX8* (L) in *WT* and *CEP83*<sup>-/-</sup> cells at the indicated time points based on bulk RNA  
384 sequencing. n= 3 clones per group. Data are mean ± SD. \**P* < 0.05, \*\**P* < 0.01, \*\*\**P* < 0.001 and \*\*\*\**P* <  
385 0.0001. ns= not significant. Panels B, C and D: Bar = 50 μm. See Figure 3- source data 1-2. See also  
386 Figure 3- figure supplements 1-2.

### 387 **CEP83 deficiency associates with molecular defects of nephron progenitor cells**

388 We next aimed to gain molecular insights into the lineage impact of *CEP83* deficiency  
389 during the course of kidney epithelial differentiation. Since no global transcriptomic  
390 differences were detectable between *WT* and *CEP83*<sup>-/-</sup> hiPSCs prior to differentiation (see  
391 above), we focussed on mesodermal cell stages induced at D7, which displayed mild  
392 overall gene expression differences between *WT* and *CEP83*-deficient cells as detected  
393 by bulk RNA sequencing (**Figure 4- figure supplements 1A, B, and Figure 4- figure**  
394 **supplement 2**).

395 A marked upregulation of nephron progenitor marker genes (*GATA3*, *HOXB7*, *HOXD11*,  
396 *EYA1*)<sup>35-42</sup> was observed in both *WT* and *CEP83*<sup>-/-</sup> cells at day 7 (**Figure 4- figure**  
397 **supplement 3A-D**), suggesting that the differentiation path of pluripotent *CEP83*<sup>-/-</sup> cells  
398 to IM nephron progenitors was largely intact. To understand the potential molecular  
399 defects at the IM stage in more detail, we performed single-cell RNA (scRNA) sequencing

400 on D7 *WT* and *CEP83*<sup>-/-</sup> cells (representing two different iPSC clones for each condition  
401 differentiated in two separate experiments). We obtained transcriptomes from 27,328  
402 cells, representing clones *WT1* (experiment 1, 3,768 cells), *WT2* (experiment 2, 5,793  
403 cells), *KO1* (experiment 1, 8,503 cells), and *KO2* (experiment 2, 9,264 cells). Principal  
404 component analysis (PCA) using pseudo-bulk expression data of the top 1000 highly  
405 variable genes indicated that the first major component (dimension 1, explaining 54% of  
406 expression variation) was driven by the genotype (*WT* vs. *KO*), while the second major  
407 component (dimension 2, explaining 51% of expression variation) was driven by a batch  
408 effect of the two experiments (**Figure 4A**). We combined all cells and generated a Uniform  
409 Manifold Approximation and Projection (UMAP) plot uncovering 10 different cell  
410 states/clusters (0-9; **Figure 4B**). We identified marker genes for each cluster (**Figure 4C**),  
411 indicating that clusters 1, 3 and 4 represented kidney progenitors/nascent nephrons  
412 (expressing e. g. *PAX8*, *EYA1*, *HOXB7*) in different phases of the cell cycle. Other clusters  
413 represented as-of-yet uncharacterized cell types, which was consistent with previous  
414 single cell transcriptome analyses from iPSC-derived cells induced by the same induction  
415 protocol<sup>43,44</sup>. Each of the four samples (*WT1*, *WT2*, *KO1*, and *KO2*) contributed to each  
416 cluster (**Figure 4D**). We focussed on kidney progenitors (cluster 1, 3, 4) and found that a  
417 substantially lower percentage of *KO* cells (11.9-12.5%) contributed to cluster 1 when  
418 compared with *WT* cells (25.9-36.3%) (**Figure 5A**). In contrast, similar percentages of *WT*  
419 and *KO* cells were represented in kidney progenitor clusters 3 and 4 (**Figure 5B, C**).  
420 Differential gene expression analysis in these three clusters indicated significantly lower  
421 expression of kidney progenitor markers *PAX8*, *EYA1* and *HOXB7* in *KO* cells from  
422 clusters 1, 3, and 4 when compared to *WT* cells (**Figure 5 D, E, F; Figure 5- figure**



423 **supplement 1)**. These results indicate that *CEP83* deficiency remained permissive with  
 424 initial kidney progenitor induction, but that these cells exhibited mild molecular defects  
 425 detectable by differential expression of kidney progenitor genes, which potentially  
 426 contributed to the failure of *CEP83*-deficient cells to further differentiate towards mature  
 427 kidney cell types.

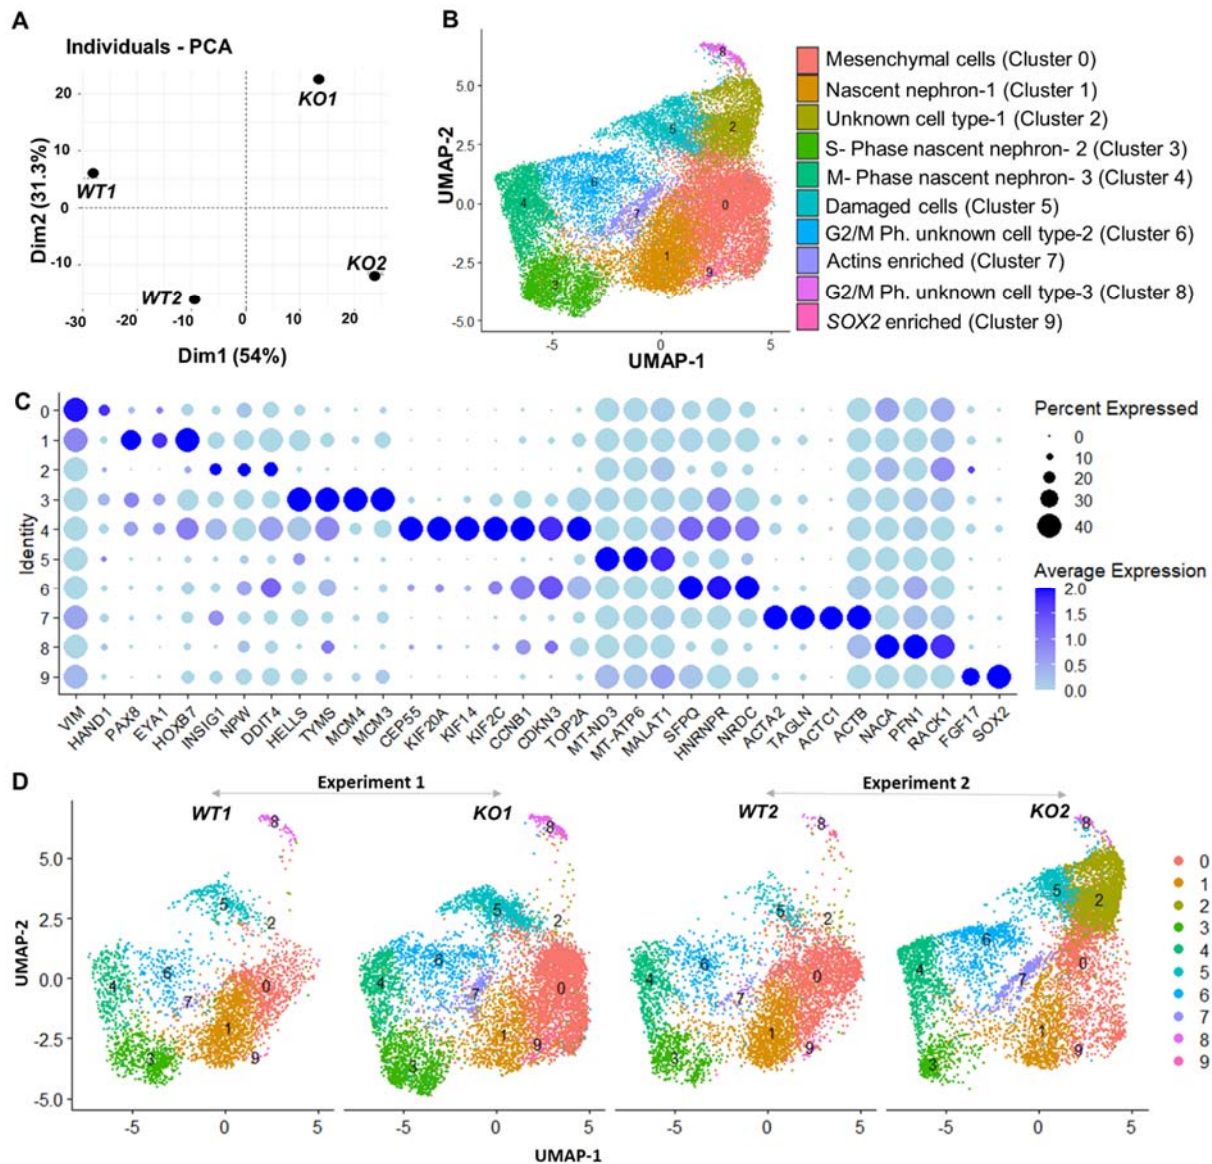

428 **Figure 4: Gene expression differences of WT and *CEP83*<sup>-/-</sup> D7 monolayers based on bulk and single**  
 429 **cell transcriptomics.** (A) Principal component analysis (PCA) of WT (*WT1*, *WT2*) and *CEP83*<sup>-/-</sup> (*KO1*,  
 430 *KO2*) cells at day 7 using the average gene expression of the top highly variable 1000 genes in pseudo-

431 bulk scRNA sequencing data. The % variation explained by each PCA axis is indicated in brackets. (B)  
432 PCA eigenvalues indicates that the principal components, Dim 1 (54%) and Dim 2 (31.3%), account for  
433 85.3 % of the expression differences. Dim 1 separates the WT samples from the KO samples, while Dim 2  
434 separates experiment 1 (*WT1*, *KO1*) from experiment 2 (*WT2*, *KO2*). (B) UMAP of scRNA-seq profiles from  
435 27,328 cells from two wildtype clones (*WT1*, *WT2*) and two *CEP83*<sup>-/-</sup> clones (*KO1*, *KO2*) derived from two  
436 separate experiments (experiment 1: *WT1*, *KO1*; experiment 2: *WT2*, *KO2*). Unbiased clustering resulted  
437 in 10 clusters and (C) dot plot showing expression of selected marker genes of each cluster. (D) UMAP  
438 plots for *WT* and *KO* samples showing the distribution of all clusters per sample N=2 per group in B-D. See  
439 Figure 4- figure supplements 1-3. Source data is available as described in section (Data availability).

440 ***CEP83* deficiency promotes ectopic induction of lateral plate mesoderm-like cells**  
441 **followed by an expansion of cardiac and vascular progenitors**

442 We next inspected single cell transcriptomes and bulk RNA sequencing data from D7  
443 cells for genes that were up-regulated in *CEP83*<sup>-/-</sup> cells compared to WT cells. From this  
444 analysis, we observed a consistent upregulation of genes that are normally expressed in  
445 early lateral plate mesoderm (LPM), including *OSR1*, *FOXF1*, *FOXF2*, *FENDRR*, *HAND1*,  
446 *HAND2*, *CXCL12*, *GATA5*, and *GATA6*<sup>45-69</sup> (**Figure 6A-I**). This suggested that *CEP83*<sup>-/-</sup>  
447 cells entered an aberrant differentiation path assuming a phenotype indicative of broader  
448 LPM instead of more specific IM. To further substantiate this idea, we restricted the  
449 analysis to progenitor cells of clusters 1, 3, and 4 and to cells from cluster 0, which  
450 exhibited a mesenchymal transcriptome fingerprint (**see Figure 4C**). Within each cell, we  
451 analyzed the expression of LPM markers (*FOXF1*, *HAND1*, *HAND2*, and *CXCL12*) and  
452 of more restricted IM markers (*PAX8*, *EYA1*, and *HOXB7*) (**Figure 6- figure supplement**  
453 **1**).

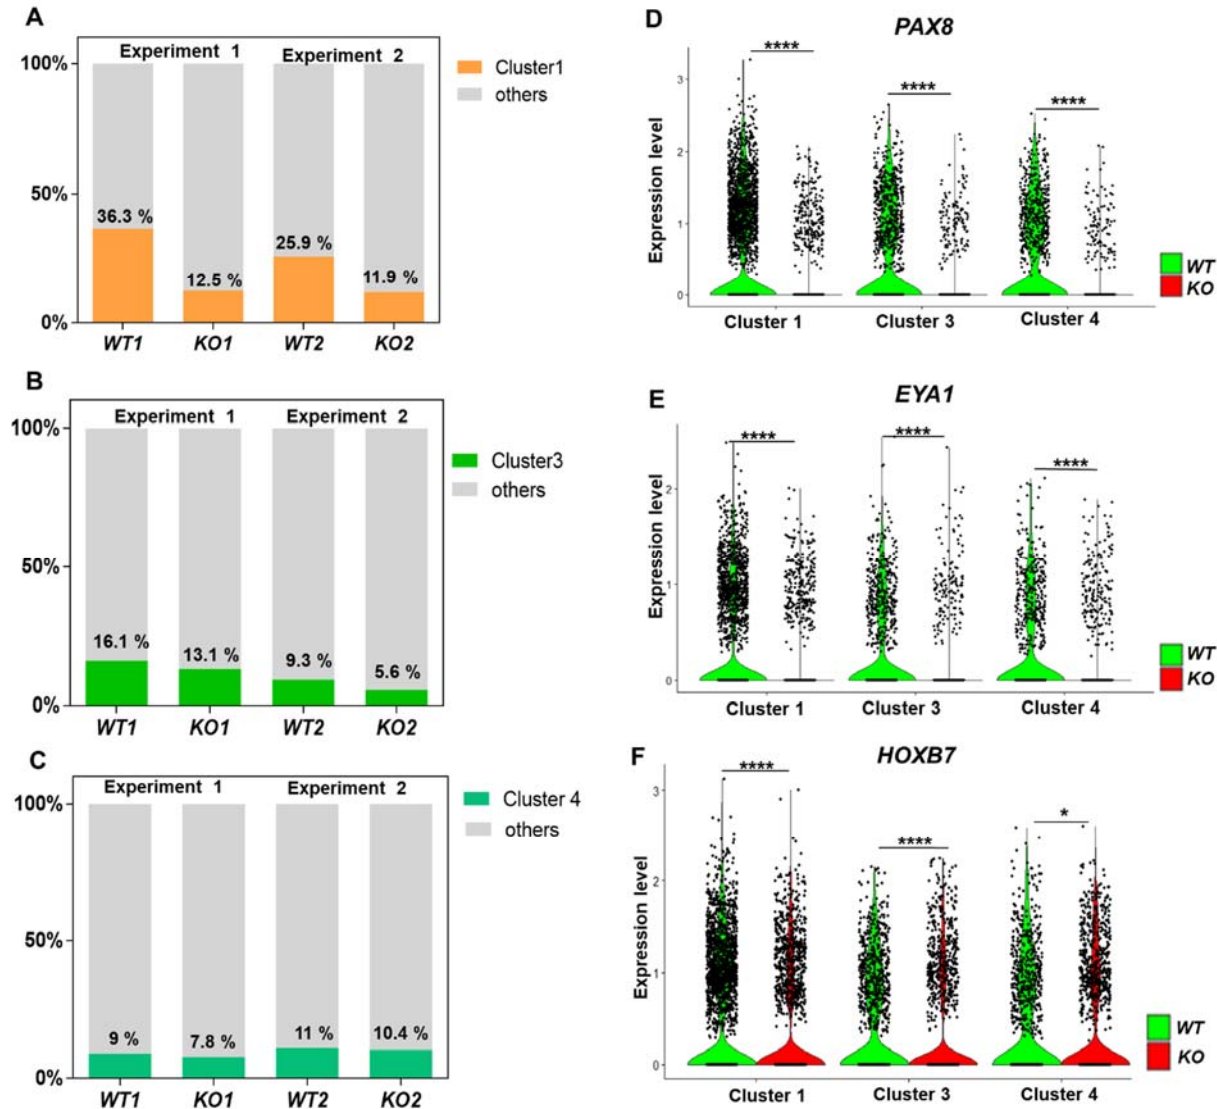

454 **Figure 5: Defective kidney progenitor differentiation from *CEP83*<sup>-/-</sup> cells after 7 days of monolayer**  
 455 **induction.** (A, B, C) Proportions of cells from kidney progenitor clusters 1 (A), 3 (B) and 4 (C) among  
 456 *wildtype* (WT1, WT2) and *CEP83*<sup>-/-</sup> (KO1, KO2) cells. (D, E, F) Violin plots of gene expression of kidney  
 457 progenitor genes *PAX8* (D), *EYA1* (E) and *HOXB7* (F) within kidney progenitor clusters 1, 3 and 4  
 458 comparing *wildtype* (WT) and *CEP83*<sup>-/-</sup> (KO) cells. N= 2 per group. \**P* < 0.05 and \*\*\*\**P* < 0.0001. Figure 5-  
 459 figure supplement 1. Source data is available as described in section (Data availability).

460 This analysis indicated that *WT* cells of these clusters exhibited an IM-like phenotype,  
 461 while *KO* cells were shifted towards an LPM-like phenotype. The common IM/LPM marker  
 462 *OSR1* was expressed at higher level in *KO* cells comparing to the *WT* cells.

463 We then inspected RNA-seq data from *WT* and *KO* organoids at day 25 for the expression  
464 of LPM genes and markers of LPM derivatives. The expression of several LPM genes  
465 (*OSR1*, *FOXF1*, *FOXF2*, *FENDRR*, *HAND1*, *HAND2* and *CXCL12*) was strongly up-  
466 regulated in *KO* cells compared to *WT* cells suggesting that an LPM-like cell pool  
467 persisted in D25 *KO* organoids (**Figure 6A-I**). To further substantiate the potential  
468 differentiation of the *CEP83*-mutant cells into broadly LPM-like cells, we compared genes  
469 that were upregulated genes in D25 organoids (in total, 397 genes) with LPM genes that  
470 were previously identified by single cell transcriptomics of sorted post-gastrulation LPM  
471 cells from developing zebrafish<sup>33,59,60</sup>. Our targeted comparison documented that *CEP83*  
472 <sup>-/-</sup>organoids showed significant enrichment for expression of orthologs of early LPM genes  
473 (p=0.006) (**Figure 6- figure supplement 2**), including *OSR1*, *CXCL12*, *HAND1/2*,  
474 *KCTD12*, *PIK3R3*, and *ZBTB2*. A subset of LPM genes enriched for expression in *CEP83*-  
475 mutant cells at D25 of differentiation were indicative of cardiac or cardiopharyngeal (*ISL1*,  
476 *TBX1*) as well as of vascular progenitor (*SOX7*, *SOX11*, *NAP1L3*, *LMO2*, *GATA2*)  
477 differentiation<sup>70-77</sup> (**Figure 6 J-P**). Taken together, these observations document that  
478 hiPSCs without *CEP83* respond to an *in vitro* differentiation program towards kidney  
479 progenitors, yet diverge towards a broader LPM progenitor composition without significant  
480 IM instead.

481

482

483

484



### I. Early lateral plate mesoderm marker (LPM) genes.

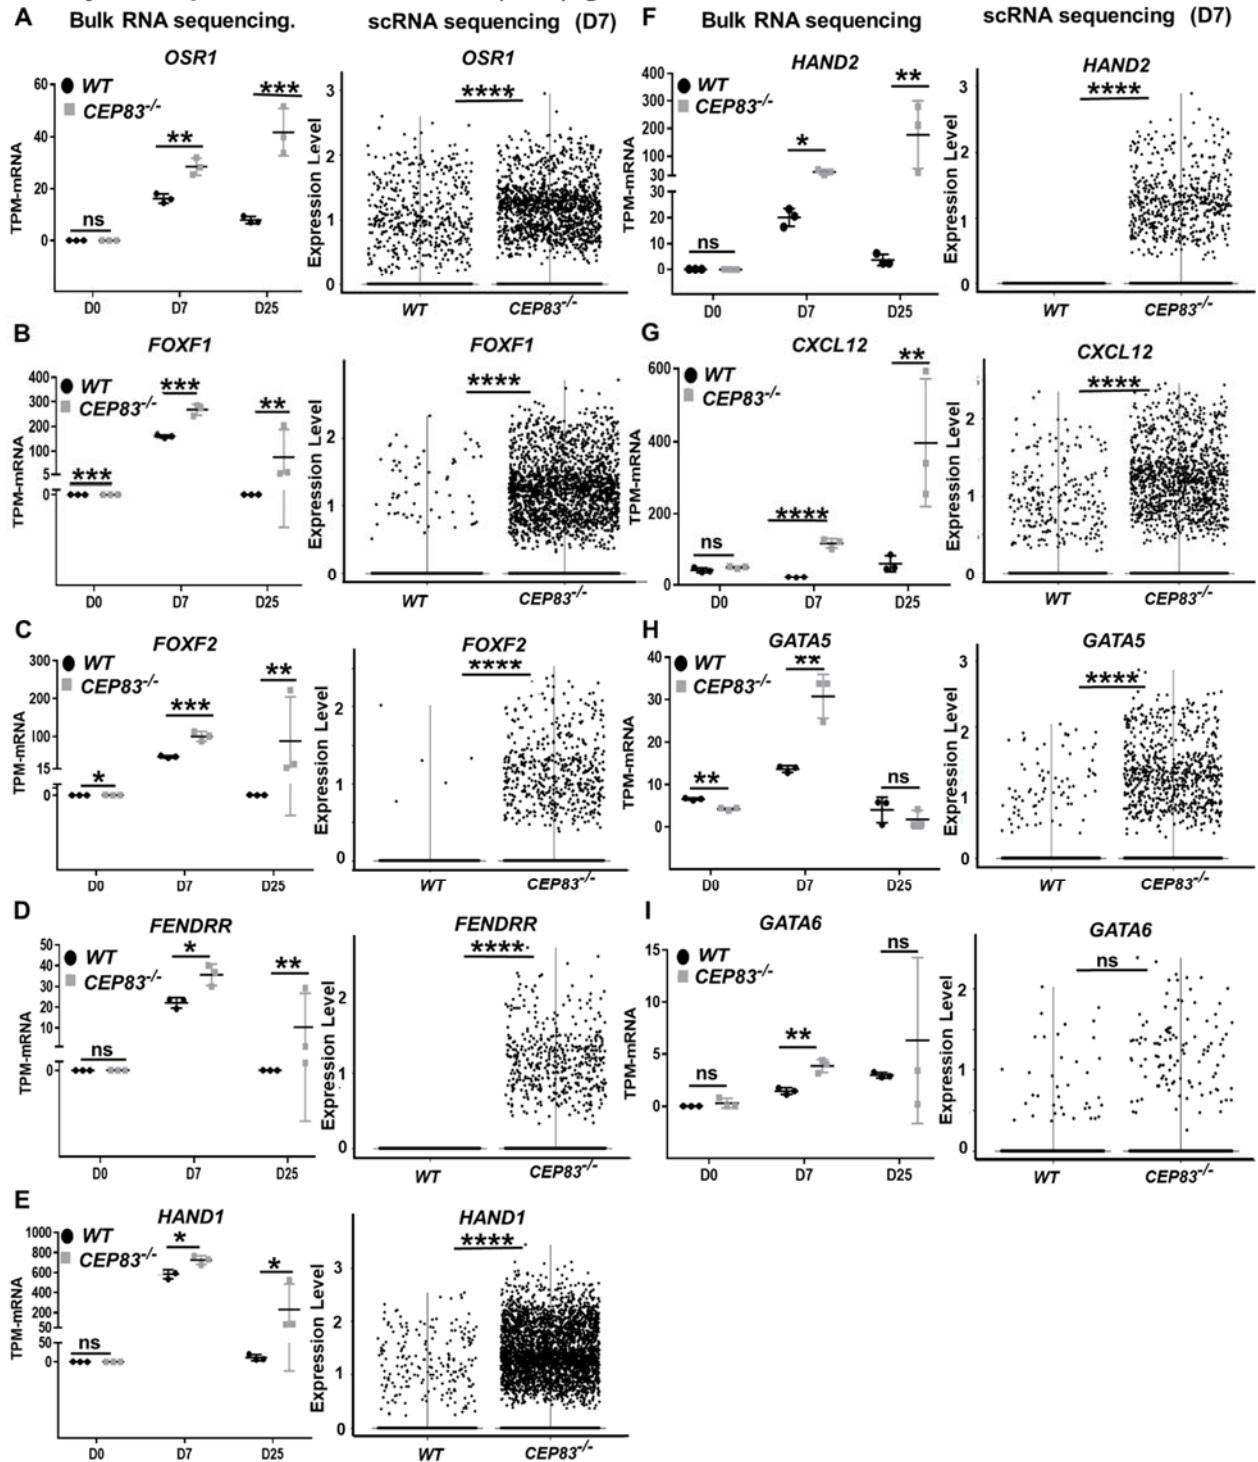

## II. Cardiovascular progenitor marker genes.

### i. Cardiomyocytes marker genes.

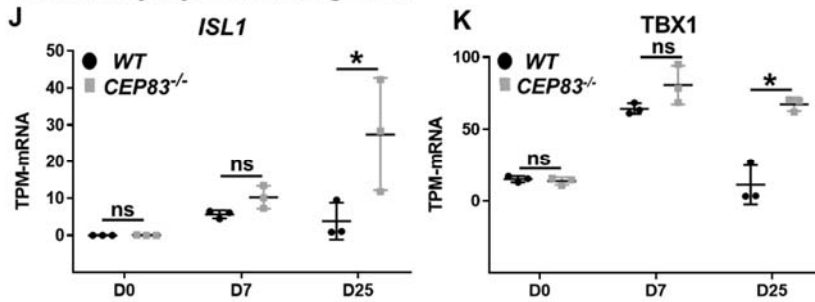

### ii. Vascular progenitor marker genes.

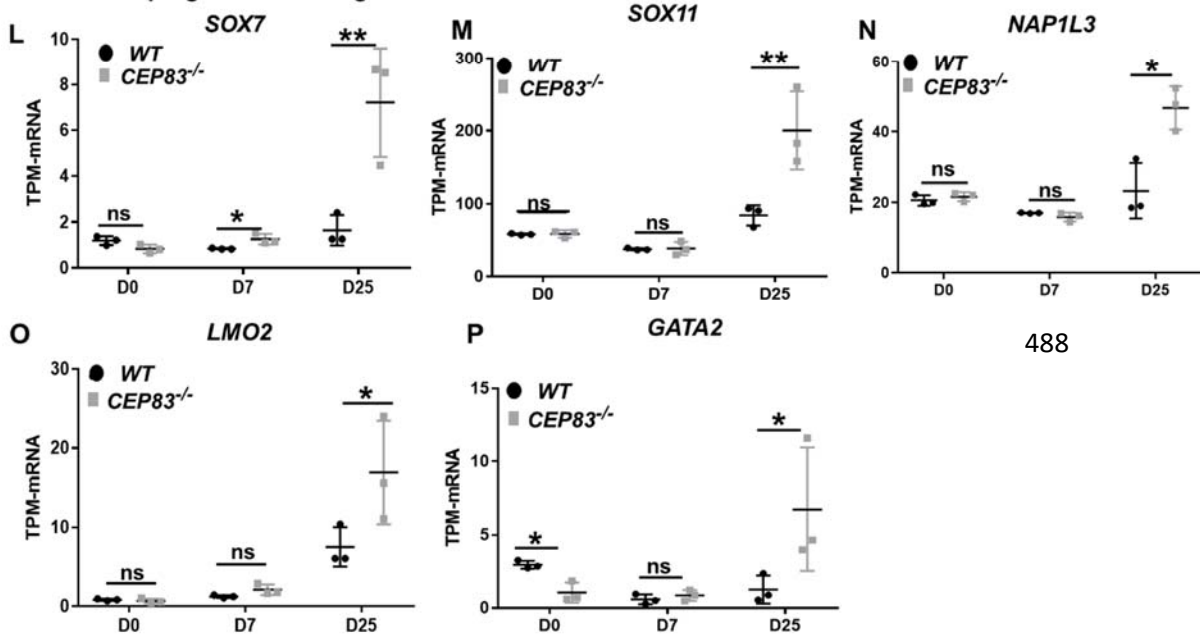

493 **Figure 6: CEP83<sup>-/-</sup> cells upregulate expression of genes characteristic of early lateral plate**  
 494 **mesoderm, cardiomyocyte progenitors and vascular progenitors. (A-I)** Expression of early lateral  
 495 plate mesoderm (LPM) markers *OSR1* (A), *FOXF1* (B), *FOXF2* (C), *FENDRR* (D), *HAND1* (E), *HAND2* (F),  
 496 *CXCL12* (G), *GATA5* (H), and *GATA6* (I) in wildtype (WT) and *CEP83<sup>-/-</sup>* cells at day 0 (D0), day 7 (D7) and  
 497 day 25 (D25) according to bulk RNA-sequencing (left panels) and at D7 according to single cell RNA  
 498 sequencing (right panels). (J-P) Expression of cardiomyocyte markers *ISL1* (J), *TBX1* (K) and vascular  
 499 progenitor markers *SOX7* (L), *SOX11* (M), *NAP1L3* (N), *LMO2* (O) and *GATA2* (P) in wildtype (WT) and  
 500 *CEP83<sup>-/-</sup>* cells at day 0 (D0), day 7 (D7) and day 25 (D25) according to bulk RNA-sequencing. N = 3 clones  
 501 per group for bulk RNA seq. N = 2 clones per group for scRNA-seq. Expression units are mean transcripts  
 502 per million (TPM) ± SD. \**P* < 0.05, \*\**P* < 0.01, \*\*\**P* < 0.001 and \*\*\*\**P* < 0.0001. ns= not significant. See

503 Figure 6- figure supplements 1- 2. See also Figure 6- source data 1. Check data availability section for  
504 other source data.

## 505 **Discussion:**

506 This study indicates a novel contribution of CEP83 in regulating the differentiation path  
507 from human pluripotent stem cells to kidney progenitors. We pinpoint a stage at day 7 of  
508 intermediate mesoderm induction where *CEP83* loss of function results in a decreased  
509 nephron progenitor pool with down-regulation of critical kidney progenitor genes (*PAX8*,  
510 *EYA1*, *HOXB7*). At the same stage, genes typical of LPM specification (including *FOXF1*,  
511 *FOXF2*, *FENDRR*, *HAND1*, *HAND2*) are up-regulated (**Figure 7**). Functionally, these  
512 alterations are associated with an inability of *CEP83*-deficient cells to form kidney  
513 epithelia. Organoids derived from *CEP83*-deficient cells fail to induce any detectable  
514 nephron structures, suggesting a novel role for CEP83 during the specification of  
515 functional kidney progenitors in the mesoderm.

516 Our findings are relevant to understanding cellular and molecular functions of CEP83 and  
517 might be relevant to the pathophysiology of human genetic diseases. To date, eleven  
518 patients with biallelic mutations of *CEP83* have been reported, eight of which displayed  
519 kidney phenotypes<sup>9,78,79</sup>. Available kidney histologies identified microcystic tubular  
520 dilatations, tubular atrophy, thickened basement membranes and interstitial fibrosis.  
521 Extrarenal phenotypes included speech delay, intellectual disability, hydrocephalus,  
522 strabismus, retinal degeneration, retinitis pigmentosa, hepatic cytolysis, cholestasis, and  
523 portal septal fibrosis with mild thickening of arterial walls and increase in the number of  
524 the biliary canalicules on liver biopsy. Among individuals with *CEP83* mutations, all but

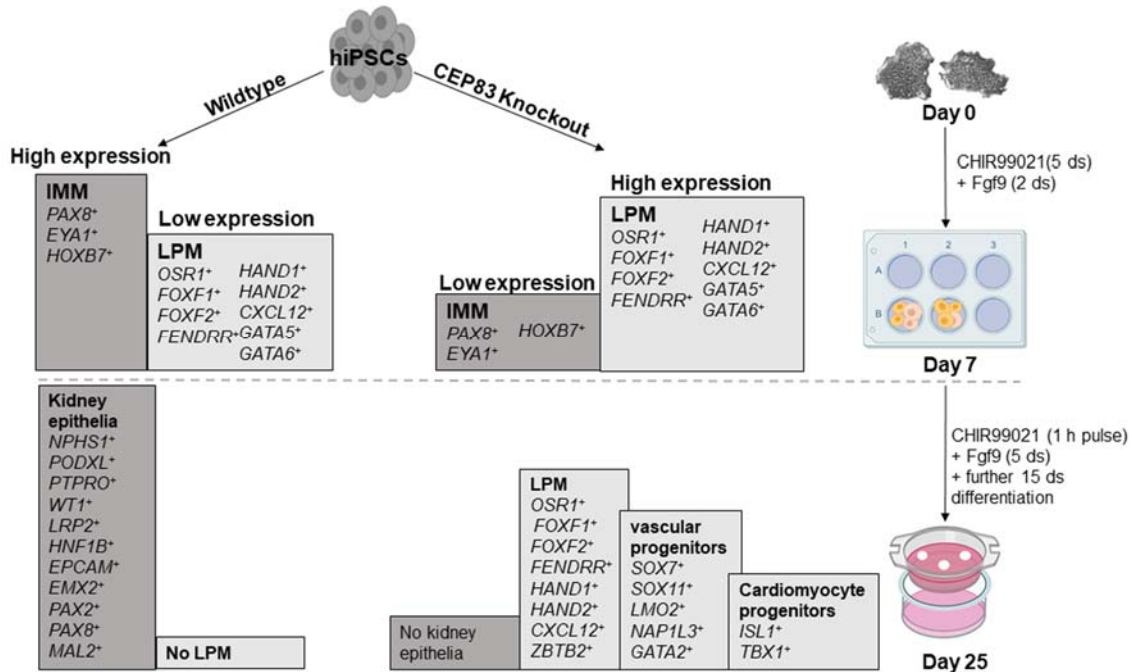

525 **Figure 7: Schematic model outlining the functional differences between wildtype and CEP83**  
 526 **knockout cells during the course of differentiation of human pluripotent stem cells towards kidney**  
 527 **cells. Intermediate mesoderm, IMM; lateral plate mesoderm, LPM.**

528 one carried at least one missense mutation or short in-frame deletion, suggesting that  
 529 *CEP83* function may have been partially preserved. One individual with presumed full  
 530 loss of *CEP83* displayed a more severe phenotype with multiple organ dysfunction. It will  
 531 be interesting to await future reports of additional *CEP83* mutations in humans and  
 532 whether complete loss of function alleles will result in broader mesoderm defects or renal  
 533 agenesis. In this regard, it is interesting that mice with a targeted homozygous loss-of-  
 534 function mutation of their *CEP83* ortholog (*Cep83<sup>tm1.1(KOMP)Vlcr</sup>*) display midembryonic  
 535 lethality (at E12.5) with evidence of severe developmental delay as early as E9.5  
 536 (<https://www.mousephenotype.org/data/genes/MGI:1924298>). These phenotypes are  
 537 potentially consistent with a role of *CEP83* in germ layer patterning and mesoderm

538 development, but a more detailed phenotypical characterization of *Cep83* knockout  
539 embryos would be required to substantiate this possibility.

540 The precise molecular and cellular mechanisms underlying our observations remain to  
541 be determined. CEP83 is a protein that is necessary for the assembly of DAPs and  
542 primary cilia formation in several cell types<sup>4,5,10,80-82</sup>. A potential involvement of CEP83-  
543 mediated primary cilia formation in the findings reported here is suggested by obvious  
544 ciliary defects in CEP83-deficient cells at the D7 and at the organoid stage (**Figure 2D-  
545 G, Figure 2- figure supplement 1**). These defects include reduced percentages of  
546 ciliated cells and elongated primary cilia in those cells that continue to form a primary  
547 cilium.

548 We observed downregulated expression of the key nephron progenitor genes *PAX8*,  
549 *EYA1*, and *HOXB7* in *CEP83*<sup>-/-</sup> cells at day 7, which might explain their failure to  
550 differentiate into kidney cells, since each of these genes is essential for normal kidney  
551 development<sup>42,83-86</sup>. Defects during nephron progenitor differentiation in the IM would be  
552 expected to result in severe kidney phenotypes such as renal agenesis or renal  
553 hypodysplasia. Defects of centriolar components or cilia have previously been linked to  
554 such phenotypes: in mice, centrosome amplification, i. e. the formation of excess  
555 centrosomes per cell, severely disrupts kidney development, resulting in depletion of  
556 renal progenitors and renal hypoplasia<sup>87</sup>. In humans, loss of KIF14, a protein necessary  
557 for proper DAP assembly and cilium formation, has been associated with kidney  
558 malformations, including renal agenesis and renal dysplasia<sup>88-90</sup>. Furthermore, Kif3a, a  
559 ciliary protein involved in intraflagellar transport, is necessary for normal mesoderm  
560 formation and kidney progenitor-specific defects of Kif3a have been associated with

561 reduced nephron numbers<sup>91,92</sup>. Similarly, mouse genes encoding the ciliary intraflagellar  
562 transport proteins IFT25 and IFT27 have been associated with renal agenesis or renal  
563 hypoplasia<sup>93,94</sup>. Together, these studies highlight the importance of molecules involved in  
564 ciliogenesis for mesoderm and kidney progenitor development and suggest that CEP83  
565 contributes to such processes by facilitating an early step of ciliogenesis. Nevertheless,  
566 the detailed molecular processes that link CEP83 function, cilia formation, and kidney  
567 progenitor specification remain to be determined.

568 The finding of various upregulated LPM markers in *CEP83*<sup>-/-</sup> cells starting from day 7  
569 suggests that CEP83 function maybe involved in finetuning the balance of LPM and IM,  
570 thereby contributing to lineage decisions during mesoderm formation. Crosstalk of LPM  
571 and IM has been reported previously in zebrafish, overexpression of LPM transcription  
572 factors *Scl/Tal1* and *Lmo2* induces ectopic vessel and blood specification while inhibiting  
573 IM formation<sup>95</sup>. Furthermore, the LPM transcription factor *Hand2* is critical in determining  
574 the size of the IM, while natively expressed in the IM-adjacent LPM progenitors that form  
575 mesothelia<sup>33,58</sup>. Loss of *Hand2* in zebrafish results in an expanded IM, whereas *Hand2*  
576 overexpression reduces or abolishes the IM. Interestingly, *HAND2* was among the most  
577 strongly induced transcripts in our *CEP83*<sup>-/-</sup> cells at day 7; connecting with the  
578 developmental role of *Hand2* in IM formation, these observations suggest that *HAND2*  
579 expression in CEP83-deficient cells may have contributed to the reduced numbers of  
580 nephron progenitor cells at this stage. Of note, CEP83-deficient cells at D25 expressed  
581 increased levels of LPM genes expressed in mesothelial (including *OSR1*, *CXCL12*,  
582 *HAND1/2*), cardiopharyngeal (including *ISL1*, *TBX1*), and endothelial/hematopoietic  
583 (including *TAL1*, *LMO2*, *GATA2*) progenitors<sup>33,60</sup>. In sum, we propose a novel role for

584 CEP83 in regulating the development of IM nephron progenitors, which may involve direct  
585 effects of CEP83 in the nephron progenitor differentiation program and indirect LPM-  
586 mediated effects on the IM. Future studies are warranted to delineate the molecular and  
587 cellular mechanisms underlying CEP83 function in LPM and specifically IM patterning.

#### 588 **Acknowledgements:**

589 We thank Tatjana Luganskaja for excellent technical support. This work was supported  
590 by grants to K.M.S.-O. from the Deutsche Forschungsgemeinschaft (DFG; SFB 1365,  
591 GRK 2318 and FOR 2841), by stipends to F.M. by the Egyptian government, by the  
592 Urological Research Foundation (Berlin), a Swiss National Science Foundation  
593 postdoctoral fellowship to J.K.-R., and the University of Colorado School of Medicine,  
594 Anschutz Medical Campus, and the Children's Hospital Colorado Foundation to C.M..

#### 595 **Competing interests: none**

596

#### 597 **Data availability**

598 All data supporting the findings of this study are available within the article and its  
599 supplementary files. Source data files have been provided for Figures 1 to 6. Sequencing  
600 data have been deposited in GEO at  
601 <https://www.ncbi.nlm.nih.gov/geo/query/acc.cgi?acc=GSE205978> (Reviewers TOKEN:  
602 mzkfymcwzzwptib).

603

604



605

606

607 **References:**

- 608 1 Davidson, A. J., Lewis, P., Przepiorski, A. & Sander, V. Turning mesoderm into  
609 kidney. *Seminars in cell & developmental biology* **91**, 86-93,  
610 doi:10.1016/j.semcdb.2018.08.016 (2019).
- 611 2 Prummel, K. D., Nieuwenhuize, S. & Mosimann, C. The lateral plate mesoderm.  
612 *Development (Cambridge, England)* **147**, doi:10.1242/dev.175059 (2020).
- 613 3 Lo, C.-H., Lin, I., Yang, T. T., Huang, Y.-C., Tanos, B. E., Chou, P.-C., Chang, C.-  
614 W., Tsay, Y.-G., Liao, J.-C. & Wang, W.-J. Phosphorylation of CEP83 by TTBK2  
615 is necessary for cilia initiation. *Journal of Cell Biology* **218**, 3489-3505 (2019).
- 616 4 Tanos, B. E., Yang, H.-J., Soni, R., Wang, W.-J., Macaluso, F. P., Asara, J. M. &  
617 Tsou, M.-F. B. Centriole distal appendages promote membrane docking, leading  
618 to cilia initiation. *Genes & development* **27**, 163-168 (2013).
- 619 5 Yang, T. T., Chong, W. M., Wang, W.-J., Mazo, G., Tanos, B., Chen, Z., Tran, T.  
620 M. N., Chen, Y.-D., Weng, R. R. & Huang, C.-E. Super-resolution architecture of  
621 mammalian centriole distal appendages reveals distinct blade and matrix  
622 functional components. *Nature communications* **9**, 1-11 (2018).
- 623 6 Kurtulmus, B., Yuan, C., Schuy, J., Neuner, A., Hata, S., Kalamakis, G., Martin-  
624 Villalba, A. & Pereira, G. LRRC45 contributes to early steps of axoneme extension.  
625 *Journal of cell science* **131** (2018).



- 626 7 Wheway, G., Schmidts, M., Mans, D. A., Szymanska, K., Nguyen, T. T., Racher,  
627 H., Phelps, I. G., Toedt, G., Kennedy, J., Wunderlich, K. A., Soroush, N.,  
628 Abdelhamed, Z. A., Natarajan, S., Herridge, W., van Reeuwijk, J., Horn, N., Boldt,  
629 K., Parry, D. A., Letteboer, S. J. F., Roosing, S., Adams, M., Bell, S. M., Bond, J.,  
630 Higgins, J., Morrison, E. E., Tomlinson, D. C., Slaats, G. G., van Dam, T. J. P.,  
631 Huang, L., Kessler, K., Giessl, A., Logan, C. V., Boyle, E. A., Shendure, J., Anazi,  
632 S., Aldahmesh, M., Al Hazzaa, S., Hegele, R. A., Ober, C., Frosk, P., Mhanni, A.  
633 A., Chodirker, B. N., Chudley, A. E., Lamont, R., Bernier, F. P., Beaulieu, C. L.,  
634 Gordon, P., Pon, R. T., Donahue, C., Barkovich, A. J., Wolf, L., Toomes, C., Thiel,  
635 C. T., Boycott, K. M., McKibbin, M., Inglehearn, C. F., Stewart, F., Omran, H.,  
636 Huynen, M. A., Sergouniotis, P. I., Alkuraya, F. S., Parboosingh, J. S., Innes, A.  
637 M., Willoughby, C. E., Giles, R. H., Webster, A. R., Ueffing, M., Blacque, O.,  
638 Gleeson, J. G., Wolfrum, U., Beales, P. L., Gibson, T., Doherty, D., Mitchison, H.  
639 M., Roepman, R. & Johnson, C. A. An siRNA-based functional genomics screen  
640 for the identification of regulators of ciliogenesis and ciliopathy genes. *Nat Cell Biol*  
641 **17**, 1074-1087, doi:10.1038/ncb3201 (2015).
- 642 8 Bowler, M., Kong, D., Sun, S., Nanjundappa, R., Evans, L., Farmer, V., Holland,  
643 A., Mahjoub, M. R., Sui, H. & Loncarek, J. High-resolution characterization of  
644 centriole distal appendage morphology and dynamics by correlative STORM and  
645 electron microscopy. *Nature Communications* **10**, 993, doi:10.1038/s41467-018-  
646 08216-4 (2019).
- 647 9 Failler, M., Gee, H. Y., Krug, P., Joo, K., Halbritter, J., Belkacem, L., Filhol, E.,  
648 Porath, J. D., Braun, D. A. & Schueler, M. Mutations of CEP83 cause infantile

- 649 nephronophthisis and intellectual disability. *The American Journal of Human*  
650 *Genetics* **94**, 905-914 (2014).
- 651 10 Shao, W., Yang, J., He, M., Yu, X.-Y., Lee, C. H., Yang, Z., Joyner, A. L., Anderson,  
652 K. V., Zhang, J. & Tsou, M.-F. B. Centrosome anchoring regulates progenitor  
653 properties and cortical formation. *Nature* **580**, 106-112 (2020).
- 654 11 Mansour, F., Boivin, F. J., Shaheed, I. B., Schueler, M. & Schmidt-Ott, K. M. The  
655 Role of Centrosome Distal Appendage Proteins (DAPs) in Nephronophthisis and  
656 Ciliogenesis. *International journal of molecular sciences* **22**,  
657 doi:10.3390/ijms222212253 (2021).
- 658 12 Hildebrandt, F. in *Pediatric Nephrology* (2004).
- 659 13 Luo, F. & Tao, Y. H. Nephronophthisis: a review of genotype–phenotype  
660 correlation. *Nephrology* **23**, 904-911 (2018).
- 661 14 Takahashi, K., Tanabe, K., Ohnuki, M., Narita, M., Ichisaka, T., Tomoda, K. &  
662 Yamanaka, S. Induction of pluripotent stem cells from adult human fibroblasts by  
663 defined factors. *cell* **131**, 861-872 (2007).
- 664 15 Morizane, R., Lam, A. Q., Freedman, B. S., Kishi, S., Valerius, M. T. & Bonventre,  
665 J. V. Nephron organoids derived from human pluripotent stem cells model kidney  
666 development and injury. *Nature biotechnology* **33**, 1193-1200 (2015).
- 667 16 Taguchi, A., Kaku, Y., Ohmori, T., Sharmin, S., Ogawa, M., Sasaki, H. &  
668 Nishinakamura, R. Redefining the in vivo origin of metanephric nephron  
669 progenitors enables generation of complex kidney structures from pluripotent stem  
670 cells. *Cell stem cell* **14**, 53-67 (2014).

- 671 17 Takasato, M., Er, P. X., Chiu, H. S., Maier, B., Baillie, G. J., Ferguson, C., Parton,  
672 R. G., Wolvetang, E. J., Roost, M. S., Chuva de Sousa Lopes, S. M. & Little, M. H.  
673 Kidney organoids from human iPS cells contain multiple lineages and model  
674 human nephrogenesis. *Nature* **526**, 564-568, doi:10.1038/nature15695 (2015).
- 675 18 Freedman, B. S., Brooks, C. R., Lam, A. Q., Fu, H., Morizane, R., Agrawal, V.,  
676 Saad, A. F., Li, M. K., Hughes, M. R. & Vander Werff, R. Modelling kidney disease  
677 with CRISPR-mutant kidney organoids derived from human pluripotent epiblast  
678 spheroids. *Nature communications* **6**, 8715 (2015).
- 679 19 Kumar, S. V., Er, P. X., Lawlor, K. T., Motazedian, A., Scurr, M., Ghobrial, I.,  
680 Combes, A. N., Zappia, L., Oshlack, A., Stanley, E. G. & Little, M. H. Kidney micro-  
681 organoids in suspension culture as a scalable source of human pluripotent stem  
682 cell-derived kidney cells. *Development (Cambridge, England)* **146**, dev172361,  
683 doi:10.1242/dev.172361 (2019).
- 684 20 Tan, Z., Shan, J., Rak-Raszewska, A. & Vainio, S. J. Embryonic stem cells derived  
685 kidney organoids as faithful models to target programmed nephrogenesis.  
686 *Scientific reports* **8**, 1-10 (2018).
- 687 21 Boyle, S., Misfeldt, A., Chandler, K. J., Deal, K. K., Southard-Smith, E. M.,  
688 Mortlock, D. P., Baldwin, H. S. & de Caestecker, M. Fate mapping using Cited1-  
689 CreERT2 mice demonstrates that the cap mesenchyme contains self-renewing  
690 progenitor cells and gives rise exclusively to nephronic epithelia. *Developmental*  
691 *biology* **313**, 234-245 (2008).
- 692 22 Kobayashi, A., Valerius, M. T., Mugford, J. W., Carroll, T. J., Self, M., Oliver, G. &  
693 McMahon, A. P. Six2 defines and regulates a multipotent self-renewing nephron

- 694 progenitor population throughout mammalian kidney development. *Cell stem cell*  
695 **3**, 169-181 (2008).
- 696 23 Howden, S. E., Vanslambrouck, J. M., Wilson, S. B., Tan, K. S. & Little, M. H.  
697 Reporter-based fate mapping in human kidney organoids confirms nephron  
698 lineage relationships and reveals synchronous nephron formation. *EMBO reports*  
699 **20**, e47483 (2019).
- 700 24 Kuraoka, S., Tanigawa, S., Taguchi, A., Hotta, A., Nakazato, H., Osafune, K.,  
701 Kobayashi, A. & Nishinakamura, R. PKD1-Dependent Renal Cystogenesis in  
702 Human Induced Pluripotent Stem Cell-Derived Ureteric Bud/Collecting Duct  
703 Organoids. *Journal of the American Society of Nephrology* **31**, 2355-2371 (2020).
- 704 25 Concordet, J.-P. & Haeussler, M. CRISPOR: intuitive guide selection for  
705 CRISPR/Cas9 genome editing experiments and screens. *Nucleic Acids Research*  
706 **46**, W242-W245, doi:10.1093/nar/gky354 (2018).
- 707 26 Yumlu, S., Stumm, J., Bashir, S., Dreyer, A.-K., Lisowski, P., Danner, E. & Kühn,  
708 R. Gene editing and clonal isolation of human induced pluripotent stem cells using  
709 CRISPR/Cas9. *Methods* **121-122**, 29-44,  
710 doi:<https://doi.org/10.1016/j.ymeth.2017.05.009> (2017).
- 711 27 LaFramboise, T. Single nucleotide polymorphism arrays: a decade of biological,  
712 computational and technological advances. *Nucleic Acids Research* **37**, 4181-  
713 4193, doi:10.1093/nar/gkp552 (2009).
- 714 28 Arsham, M. S., Barch, M. J. & Lawce, H. J. *The AGT cytogenetics laboratory*  
715 *manual*. (John Wiley & Sons, 2017).

- 716 29 Haraksingh, R. R., Abyzov, A. & Urban, A. E. Comprehensive performance  
717 comparison of high-resolution array platforms for genome-wide Copy Number  
718 Variation (CNV) analysis in humans. *BMC genomics* **18**, 1-14 (2017).
- 719 30 Robinson, J. T., Thorvaldsdóttir, H., Winckler, W., Guttman, M., Lander, E. S.,  
720 Getz, G. & Mesirov, J. P. Integrative genomics viewer. *Nature biotechnology* **29**,  
721 24-26 (2011).
- 722 31 Alles, J., Karaiskos, N., Praktijnjo, S. D., Grosswendt, S., Wahle, P., Ruffault, P.-  
723 L., Ayoub, S., Schreyer, L., Boltengagen, A. & Birchmeier, C. Cell fixation and  
724 preservation for droplet-based single-cell transcriptomics. *BMC biology* **15**, 1-14  
725 (2017).
- 726 32 Stuart, T., Butler, A., Hoffman, P., Hafemeister, C., Papalexi, E., Mauck III, W. M.,  
727 Hao, Y., Stoeckius, M., Smibert, P. & Satija, R. Comprehensive integration of  
728 single-cell data. *Cell* **177**, 1888-1902. e1821 (2019).
- 729 33 Prummel, K. D., Crowell, H. L., Nieuwenhuize, S., Brombacher, E. C., Daetwyler,  
730 S., Soneson, C., Kresoja-Rakic, J., Kocere, A., Ronner, M., Ernst, A., Labbaf, Z.,  
731 Clouthier, D. E., Firulli, A. B., Sánchez-Iranzo, H., Naganathan, S. R., O'Rourke,  
732 R., Raz, E., Mercader, N., Burger, A., Felley-Bosco, E., Huisken, J., Robinson, M.  
733 D. & Mosimann, C. Hand2 delineates mesothelium progenitors and is reactivated  
734 in mesothelioma. *Nature Communications* **13**, 1677, doi:10.1038/s41467-022-  
735 29311-7 (2022).
- 736 34 Takasato, M., Pei, X. E., Chiu, H. S., Maier, B., Baillie, G. J., Ferguson, C., Parton,  
737 R. G., Wolvetang, E. J., Roost, M. S. & de Sousa Lopes, S. M. C. Kidney organoids

- 738 from human iPS cells contain multiple lineages and model human nephrogenesis.  
739 *Nature* **526**, 564-568 (2015).
- 740 35 Bilous, R. W., Murty, G., Parkinson, D. B., Thakker, R. V., Coulthard, M. G., Burn,  
741 J., Mathias, D. & Kendall-Taylor, P. Autosomal dominant familial  
742 hypoparathyroidism, sensorineural deafness, and renal dysplasia. *New England*  
743 *Journal of Medicine* **327**, 1069-1074 (1992).
- 744 36 Grote, D., Souabni, A., Busslinger, M. & Bouchard, M. Pax2/8-regulated Gata3  
745 expression is necessary for morphogenesis and guidance of the nephric duct in  
746 the developing kidney. *Development (Cambridge, England)* **133**, 53-61,  
747 doi:10.1242/dev.02184 (2006).
- 748 37 Kress, C., Vogels, R., De Graaff, W., Bonnerot, C., Meijlink, F., Nicolas, J.-F. &  
749 Deschamps, J. Hox-2.3 upstream sequences mediate lacZ expression in  
750 intermediate mesoderm derivatives of transgenic mice. *Development (Cambridge,*  
751 *England)* **109**, 775-786 (1990).
- 752 38 Srinivas, S., Wu, Z., Chen, C.-M., D'Agati, V. & Costantini, F. Dominant effects of  
753 RET receptor misexpression and ligand-independent RET signaling on ureteric  
754 bud development. *Development (Cambridge, England)* **126**, 1375-1386 (1999).
- 755 39 Wellik, D. M., Hawkes, P. J. & Capecchi, M. R. Hox11 paralogous genes are  
756 essential for metanephric kidney induction. *Genes & development* **16**, 1423-1432  
757 (2002).
- 758 40 Mugford, J. W., Sipilä, P., Kobayashi, A., Behringer, R. R. & McMahon, A. P.  
759 Hoxd11 specifies a program of metanephric kidney development within the



- 760 intermediate mesoderm of the mouse embryo. *Developmental biology* **319**, 396-  
761 405, doi:10.1016/j.ydbio.2008.03.044 (2008).
- 762 41 Ruf, R. G., Xu, P.-X., Silviu, D., Otto, E. A., Beekmann, F., Muerb, U. T., Kumar,  
763 S., Neuhaus, T. J., Kemper, M. J. & Raymond, R. M. SIX1 mutations cause  
764 branchio-oto-renal syndrome by disruption of EYA1–SIX1–DNA complexes.  
765 *Proceedings of the National Academy of Sciences* **101**, 8090-8095 (2004).
- 766 42 Sajithlal, G., Zou, D., Silviu, D. & Xu, P.-X. Eya1 acts as a critical regulator for  
767 specifying the metanephric mesenchyme. *Developmental Biology* **284**, 323-336,  
768 doi:<https://doi.org/10.1016/j.ydbio.2005.05.029> (2005).
- 769 43 Subramanian, A., Sidhom, E.-H., Emani, M., Vernon, K., Sahakian, N., Zhou, Y.,  
770 Kost-Alimova, M., Slyper, M., Waldman, J., Dionne, D., Nguyen, L. T., Weins, A.,  
771 Marshall, J. L., Rosenblatt-Rosen, O., Regev, A. & Greka, A. Single cell census of  
772 human kidney organoids shows reproducibility and diminished off-target cells after  
773 transplantation. *Nature Communications* **10**, 5462, doi:10.1038/s41467-019-  
774 13382-0 (2019).
- 775 44 Low, J. H., Li, P., Chew, E. G. Y., Zhou, B., Suzuki, K., Zhang, T., Lian, M. M., Liu,  
776 M., Aizawa, E. & Esteban, C. R. Generation of human PSC-derived kidney  
777 organoids with patterned nephron segments and a de novo vascular network. *Cell*  
778 *Stem Cell* **25**, 373-387. e379 (2019).
- 779 45 Mugford, J. W., Sipilä, P., McMahon, J. A. & McMahon, A. P. Osr1 expression  
780 demarcates a multi-potent population of intermediate mesoderm that undergoes  
781 progressive restriction to an Osr1-dependent nephron progenitor compartment  
782 within the mammalian kidney. *Developmental biology* **324**, 88-98 (2008).

- 783 46 Mae, S.-I., Shono, A., Shiota, F., Yasuno, T., Kajiwara, M., Gotoda-Nishimura, N.,  
784 Arai, S., Sato-Otubo, A., Toyoda, T., Takahashi, K., Nakayama, N., Cowan, C. A.,  
785 Aoi, T., Ogawa, S., McMahon, A. P., Yamanaka, S. & Osafune, K. Monitoring and  
786 robust induction of nephrogenic intermediate mesoderm from human pluripotent  
787 stem cells. *Nature Communications* **4**, 1367, doi:10.1038/ncomms2378 (2013).
- 788 47 Mahlapuu, M., Ormestad, M., Enerbäck, S. & Carlsson, P. The forkhead  
789 transcription factor Foxf1 is required for differentiation of extra-embryonic and  
790 lateral plate mesoderm. *Development (Cambridge, England)* **128**, 155-166 (2001).
- 791 48 Ormestad, M., Astorga, J. & Carlsson, P. Differences in the embryonic expression  
792 patterns of mouse Foxf1 and -2 match their distinct mutant phenotypes. *Dev Dyn*  
793 **229**, 328-333, doi:10.1002/dvdy.10426 (2004).
- 794 49 Wilm, B., James, R. G., Schultheiss, T. M. & Hogan, B. L. M. The forkhead genes,  
795 Foxc1 and Foxc2, regulate paraxial versus intermediate mesoderm cell fate.  
796 *Developmental Biology* **271**, 176-189,  
797 doi:<https://doi.org/10.1016/j.ydbio.2004.03.034> (2004).
- 798 50 Wotton, K. R., Mazet, F. & Shimeld, S. M. Expression of FoxC, FoxF, FoxL1, and  
799 FoxQ1 genes in the dogfish *Scyliorhinus canicula* defines ancient and derived  
800 roles for Fox genes in vertebrate development. *Developmental dynamics: an*  
801 *official publication of the American Association of Anatomists* **237**, 1590-1603  
802 (2008).
- 803 51 Grote, P., Wittler, L., Hendrix, D., Koch, F., Währisch, S., Beisaw, A., Macura, K.,  
804 Bläss, G., Kellis, M. & Werber, M. The tissue-specific lncRNA Fendrr is an essential

- 805 regulator of heart and body wall development in the mouse. *Developmental cell*  
806 **24**, 206-214 (2013).
- 807 52 Schindler, Y. L., Garske, K. M., Wang, J., Firulli, B. A., Firulli, A. B., Poss, K. D. &  
808 Yelon, D. Hand2 elevates cardiomyocyte production during zebrafish heart  
809 development and regeneration. *Development (Cambridge, England)* **141**, 3112-  
810 3122, doi:10.1242/dev.106336 (2014).
- 811 53 Tsuchihashi, T., Maeda, J., Shin, C. H., Ivey, K. N., Black, B. L., Olson, E. N.,  
812 Yamagishi, H. & Srivastava, D. Hand2 function in second heart field progenitors is  
813 essential for cardiogenesis. *Developmental biology* **351**, 62-69,  
814 doi:10.1016/j.ydbio.2010.12.023 (2011).
- 815 54 McFadden, D. G., Barbosa, A. C., Richardson, J. A., Schneider, M. D., Srivastava,  
816 D. & Olson, E. N. The Hand1 and Hand2 transcription factors regulate expansion  
817 of the embryonic cardiac ventricles in a gene dosage-dependent manner. (2005).
- 818 55 Firulli, A. B., McFadden, D. G., Lin, Q., Srivastava, D. & Olson, E. N. Heart and  
819 extra-embryonic mesodermal defects in mouse embryos lacking the bHLH  
820 transcription factor Hand1. *Nature genetics* **18**, 266-270 (1998).
- 821 56 Risebro, C. A., Smart, N., Dupays, L., Breckenridge, R., Mohun, T. J. & Riley, P.  
822 R. Hand1 regulates cardiomyocyte proliferation versus differentiation in the  
823 developing heart. *Development (Cambridge, England)* **133**, 4595-4606,  
824 doi:10.1242/dev.02625 (2006).
- 825 57 Angelo, S., Lohr, J., Lee, K. H., Ticho, B. S., Breitbart, R. E., Hill, S., Yost, H. J. &  
826 Srivastava, D. Conservation of sequence and expression of *Xenopus* and

- 827 zebrafish dHAND during cardiac, branchial arch and lateral mesoderm  
828 development. *Mechanisms of development* **95**, 231-237 (2000).
- 829 58 Perens, E. A., Garavito-Aguilar, Z. V., Guio-Vega, G. P., Peña, K. T., Schindler, Y.  
830 L. & Yelon, D. Hand2 Inhibits Kidney Specification While Promoting Vein  
831 Formation Within the Posterior Mesoderm. *bioRxiv*, 075036, doi:10.1101/075036  
832 (2016).
- 833 59 Prummel, K. D., Crowell, H. L., Nieuwenhuize, S., Brombacher, E. C., Daetwyler,  
834 S., Soneson, C., Kresoja-Rakic, J., Ronner, M., Kocere, A. & Ernst, A. Hand2  
835 delineates mesothelium progenitors and is reactivated in mesothelioma. *bioRxiv*,  
836 2020.2011.2011.355693 (2021).
- 837 60 Prummel, K. D., Nieuwenhuize, S. & Mosimann, C. The lateral plate mesoderm.  
838 *Development (Cambridge, England)* **147**, dev175059 (2020).
- 839 61 Salcedo, R. & Oppenheim, J. J. Role of chemokines in angiogenesis:  
840 CXCL12/SDF-1 and CXCR4 interaction, a key regulator of endothelial cell  
841 responses. *Microcirculation* **10**, 359-370 (2003).
- 842 62 Liekens, S., Schols, D. & Hatse, S. CXCL12-CXCR4 axis in angiogenesis,  
843 metastasis and stem cell mobilization. *Current pharmaceutical design* **16**, 3903-  
844 3920 (2010).
- 845 63 Loh, K. M., Chen, A., Koh, P. W., Deng, T. Z., Sinha, R., Tsai, J. M., Barkal, A. A.,  
846 Shen, K. Y., Jain, R., Morganti, R. M., Shyh-Chang, N., Fernhoff, N. B., George,  
847 B. M., Wernig, G., Salomon, R. E. A., Chen, Z., Vogel, H., Epstein, J. A., Kundaje,  
848 A., Talbot, W. S., Beachy, P. A., Ang, L. T. & Weissman, I. L. Mapping the Pairwise

- 849 Choices Leading from Pluripotency to Human Bone, Heart, and Other Mesoderm  
850 Cell Types. *Cell* **166**, 451-467, doi:10.1016/j.cell.2016.06.011 (2016).
- 851 64 Koutsourakis, M., Langeveld, A., Patient, R., Beddington, R. & Grosveld, F. The  
852 transcription factor GATA6 is essential for early extraembryonic development.  
853 *Development (Cambridge, England)* **126**, 723-732 (1999).
- 854 65 Holtzinger, A. & Evans, T. Gata5 and Gata6 are functionally redundant in zebrafish  
855 for specification of cardiomyocytes. *Developmental biology* **312**, 613-622 (2007).
- 856 66 Reiter, J. F., Alexander, J., Rodaway, A., Yelon, D., Patient, R., Holder, N. &  
857 Stainier, D. Y. Gata5 is required for the development of the heart and endoderm in  
858 zebrafish. *Genes & development* **13**, 2983-2995 (1999).
- 859 67 Pikkarainen, S., Tokola, H., Kerkelä, R. & Ruskoaho, H. GATA transcription factors  
860 in the developing and adult heart. *Cardiovascular research* **63**, 196-207 (2004).
- 861 68 Laverriere, A. C., MacNeill, C., Mueller, C., Poelmann, R. E., Burch, J. & Evans, T.  
862 GATA-4/5/6, a subfamily of three transcription factors transcribed in developing  
863 heart and gut. *Journal of Biological Chemistry* **269**, 23177-23184 (1994).
- 864 69 Zhao, R., Watt, A. J., Battle, M. A., Li, J., Bondow, B. J. & Duncan, S. A. Loss of  
865 both GATA4 and GATA6 blocks cardiac myocyte differentiation and results in  
866 acardia in mice. *Developmental Biology* **317**, 614-619,  
867 doi:<https://doi.org/10.1016/j.ydbio.2008.03.013> (2008).
- 868 70 Cai, C.-L., Liang, X., Shi, Y., Chu, P.-H., Pfaff, S. L., Chen, J. & Evans, S. Isl1  
869 identifies a cardiac progenitor population that proliferates prior to differentiation  
870 and contributes a majority of cells to the heart. *Developmental cell* **5**, 877-889  
871 (2003).

- 872 71 Kwon, C., Qian, L., Cheng, P., Nigam, V., Arnold, J. & Srivastava, D. A regulatory  
873 pathway involving Notch1/ $\beta$ -catenin/Isl1 determines cardiac progenitor cell fate.  
874 *Nature cell biology* **11**, 951-957 (2009).
- 875 72 Laugwitz, K.-L., Moretti, A., Lam, J., Gruber, P., Chen, Y., Woodard, S., Lin, L.-Z.,  
876 Cai, C.-L., Lu, M. M. & Reth, M. Postnatal isl1+ cardioblasts enter fully  
877 differentiated cardiomyocyte lineages. *Nature* **433**, 647-653 (2005).
- 878 73 Moretti, A., Caron, L., Nakano, A., Lam, J. T., Bernshausen, A., Chen, Y., Qyang,  
879 Y., Bu, L., Sasaki, M. & Martin-Puig, S. Multipotent embryonic isl1+ progenitor cells  
880 lead to cardiac, smooth muscle, and endothelial cell diversification. *Cell* **127**, 1151-  
881 1165 (2006).
- 882 74 Gao, R., Liang, X., Cheedipudi, S., Cordero, J., Jiang, X., Zhang, Q., Caputo, L.,  
883 Günther, S., Kuenne, C., Ren, Y., Bhattacharya, S., Yuan, X., Barreto, G., Chen,  
884 Y., Braun, T., Evans, S. M., Sun, Y. & Dobрева, G. Pioneering function of Isl1 in  
885 the epigenetic control of cardiomyocyte cell fate. *Cell Research* **29**, 486-501,  
886 doi:10.1038/s41422-019-0168-1 (2019).
- 887 75 Stennard, F. A. & Harvey, R. P. T-box transcription factors and their roles in  
888 regulatory hierarchies in the developing heart. *Development (Cambridge, England)*  
889 **132**, 4897-4910, doi:10.1242/dev.02099 (2005).
- 890 76 Baldini, A. Dissecting contiguous gene defects: TBX1. *Current opinion in genetics*  
891 *& development* **15**, 279-284, doi:10.1016/j.gde.2005.03.001 (2005).
- 892 77 Chen, L., Fulcoli, F. G., Tang, S. & Baldini, A. Tbx1 regulates proliferation and  
893 differentiation of multipotent heart progenitors. *Circ Res* **105**, 842-851,  
894 doi:10.1161/CIRCRESAHA.109.200295 (2009).



- 895 78 Veldman, B. C. F., Kuper, W. F. E., Lilien, M., Schuurs-Hoeijmakers, J. H. M.,  
896 Marcelis, C., Phan, M., Hettinga, Y., Talsma, H. E., van Hasselt, P. M. & Haijes,  
897 H. A. Beyond nephronophthisis: Retinal dystrophy in the absence of kidney  
898 dysfunction in childhood expands the clinical spectrum of CEP83 deficiency.  
899 *American journal of medical genetics. Part A* **185**, 2204-2210,  
900 doi:10.1002/ajmg.a.62225 (2021).
- 901 79 Haer-Wigman, L., van Zelst-Stams, W. A. G., Pfundt, R., van den Born, L. I.,  
902 Klaver, C. C. W., Verheij, J. B. G. M., Hoyng, C. B., Breuning, M. H., Boon, C. J.  
903 F., Kievit, A. J., Verhoeven, V. J. M., Pott, J. W. R., Sallevelt, S. C. E. H., van  
904 Hagen, J. M., Plomp, A. S., Kroes, H. Y., Lelieveld, S. H., Hehir-Kwa, J. Y.,  
905 Castelein, S., Nelen, M., Scheffer, H., Lugtenberg, D., Cremers, F. P. M.,  
906 Hoefsloot, L. & Yntema, H. G. Diagnostic exome sequencing in 266 Dutch patients  
907 with visual impairment. *European Journal of Human Genetics* **25**, 591-599,  
908 doi:10.1038/ejhg.2017.9 (2017).
- 909 80 Kumar, D., Rains, A., Herranz-Pérez, V., Lu, Q., Shi, X., Swaney, D. L., Stevenson,  
910 E., Krogan, N. J., Huang, B., Westlake, C., Garcia-Verdugo, J. M., Yoder, B. K. &  
911 Reiter, J. F. A ciliopathy complex builds distal appendages to initiate ciliogenesis.  
912 *The Journal of cell biology* **220**, doi:10.1083/jcb.202011133 (2021).
- 913 81 Stinchcombe, J. C., Randzavola, L. O., Angus, K. L., Mantell, J. M., Verkade, P. &  
914 Griffiths, G. M. Mother Centriole Distal Appendages Mediate Centrosome Docking  
915 at the Immunological Synapse and Reveal Mechanistic Parallels with Ciliogenesis.  
916 *Current biology : CB* **25**, 3239-3244, doi:10.1016/j.cub.2015.10.028 (2015).

- 917 82 Joo, K., Kim, C. G., Lee, M.-S., Moon, H.-Y., Lee, S.-H., Kim, M. J., Kweon, H.-S.,  
918 Park, W.-Y., Kim, C.-H., Gleeson, J. G. & Kim, J. CCDC41 is required for ciliary  
919 vesicle docking to the mother centriole. *Proceedings of the National Academy of*  
920 *Sciences* **110**, 5987-5992, doi:10.1073/pnas.1220927110 (2013).
- 921 83 Bouchard, M., Souabni, A., Mandler, M., Neubüser, A. & Busslinger, M. Nephric  
922 lineage specification by Pax2 and Pax8. *Genes & development* **16**, 2958-2970  
923 (2002).
- 924 84 Xu, P.-X., Adams, J., Peters, H., Brown, M. C., Heaney, S. & Maas, R. Eya1-  
925 deficient mice lack ears and kidneys and show abnormal apoptosis of organ  
926 primordia. *Nature Genetics* **23**, 113-117, doi:10.1038/12722 (1999).
- 927 85 Patterson, L. T. & Potter, S. S. Atlas of Hox gene expression in the developing  
928 kidney. *Developmental Dynamics* **229**, 771-779,  
929 doi:<https://doi.org/10.1002/dvdy.10474> (2004).
- 930 86 Rojek, A., Füchtbauer, E.-M., Kwon, T.-H., Frøkiær, J. & Nielsen, S. Severe urinary  
931 concentrating defect in renal collecting duct-selective AQP2 conditional-knockout  
932 mice. *Proceedings of the National Academy of Sciences* **103**, 6037-6042,  
933 doi:10.1073/pnas.0511324103 (2006).
- 934 87 Dionne, L. K., Shim, K., Hoshi, M., Cheng, T., Wang, J., Marthiens, V., Knoten, A.,  
935 Basto, R., Jain, S. & Mahjoub, M. R. Centrosome amplification disrupts renal  
936 development and causes cystogenesis. *The Journal of cell biology* **217**, 2485-  
937 2501, doi:10.1083/jcb.201710019 (2018).
- 938 88 Filges, I., Nosova, E., Bruder, E., Tercanli, S., Townsend, K., Gibson, W.,  
939 Röthlisberger, B., Heinemann, K., Hall, J. & Gregory-Evans, C. Exome sequencing

- 940 identifies mutations in KIF14 as a novel cause of an autosomal recessive lethal  
941 fetal ciliopathy phenotype. *Clinical genetics* **86**, 220-228 (2014).
- 942 89 Reilly, M. L., Stokman, M. F., Magry, V., Jeanpierre, C., Alves, M., Paydar, M.,  
943 Hellinga, J., Delous, M., Pouly, D. & Failler, M. Loss-of-function mutations in KIF14  
944 cause severe microcephaly and kidney development defects in humans and  
945 zebrafish. *Human molecular genetics* **28**, 778-795 (2019).
- 946 90 Pejškova, P., Reilly, M. L., Bino, L., Bernatik, O., Dolanska, L., Ganji, R. S.,  
947 Zdrahal, Z., Benmerah, A. & Cajanek, L. KIF14 controls ciliogenesis via regulation  
948 of Aurora A and is important for Hedgehog signaling. *The Journal of cell biology*  
949 **219**, doi:10.1083/jcb.201904107 (2020).
- 950 91 Takeda, S., Yonekawa, Y., Tanaka, Y., Okada, Y., Nonaka, S. & Hirokawa, N. Left-  
951 Right Asymmetry and Kinesin Superfamily Protein KIF3A: New Insights in  
952 Determination of Laterality and Mesoderm Induction by *kif3A*<sup>-/-</sup> Mice Analysis.  
953 *Journal of Cell Biology* **145**, 825-836, doi:10.1083/jcb.145.4.825 (1999).
- 954 92 Chi, L., Galtseva, A., Chen, L., Mo, R., Hui, C. C. & Rosenblum, N. D. Kif3a controls  
955 murine nephron number via GLI3 repressor, cell survival, and gene expression in  
956 a lineage-specific manner. *PloS one* **8**, e65448, doi:10.1371/journal.pone.0065448  
957 (2013).
- 958 93 Desai, P. B., San Agustin, J. T., Stuck, M. W., Jonassen, J. A., Bates, C. M. &  
959 Pazour, G. J. *Ift25* is not a cystic kidney disease gene but is required for early steps  
960 of kidney development. *Mechanisms of development* **151**, 10-17,  
961 doi:10.1016/j.mod.2018.04.001 (2018).

- 962 94 Quélin, C., Loget, P., Boutaud, L., Elkhartoufi, N., Milon, J., Odent, S., Fradin, M.,  
963 Demurger, F., Pasquier, L., Thomas, S. & Attié-Bitach, T. Loss of function IFT27  
964 variants associated with an unclassified lethal fetal ciliopathy with renal agenesis.  
965 *American journal of medical genetics. Part A* **176**, 1610-1613,  
966 doi:10.1002/ajmg.a.38685 (2018).
- 967 95 Gering, M., Yamada, Y., Rabbitts, T. H. & Patient, R. K. Lmo2 and Scl/Tal1 convert  
968 non-axial mesoderm into haemangioblasts which differentiate into endothelial cells  
969 in the absence of Gata1. *Development (Cambridge, England)* **130**, 6187-6199,  
970 doi:10.1242/dev.00875 (2003).

971

972

973

974

975

976

977

978 **Supplemental Figures:**

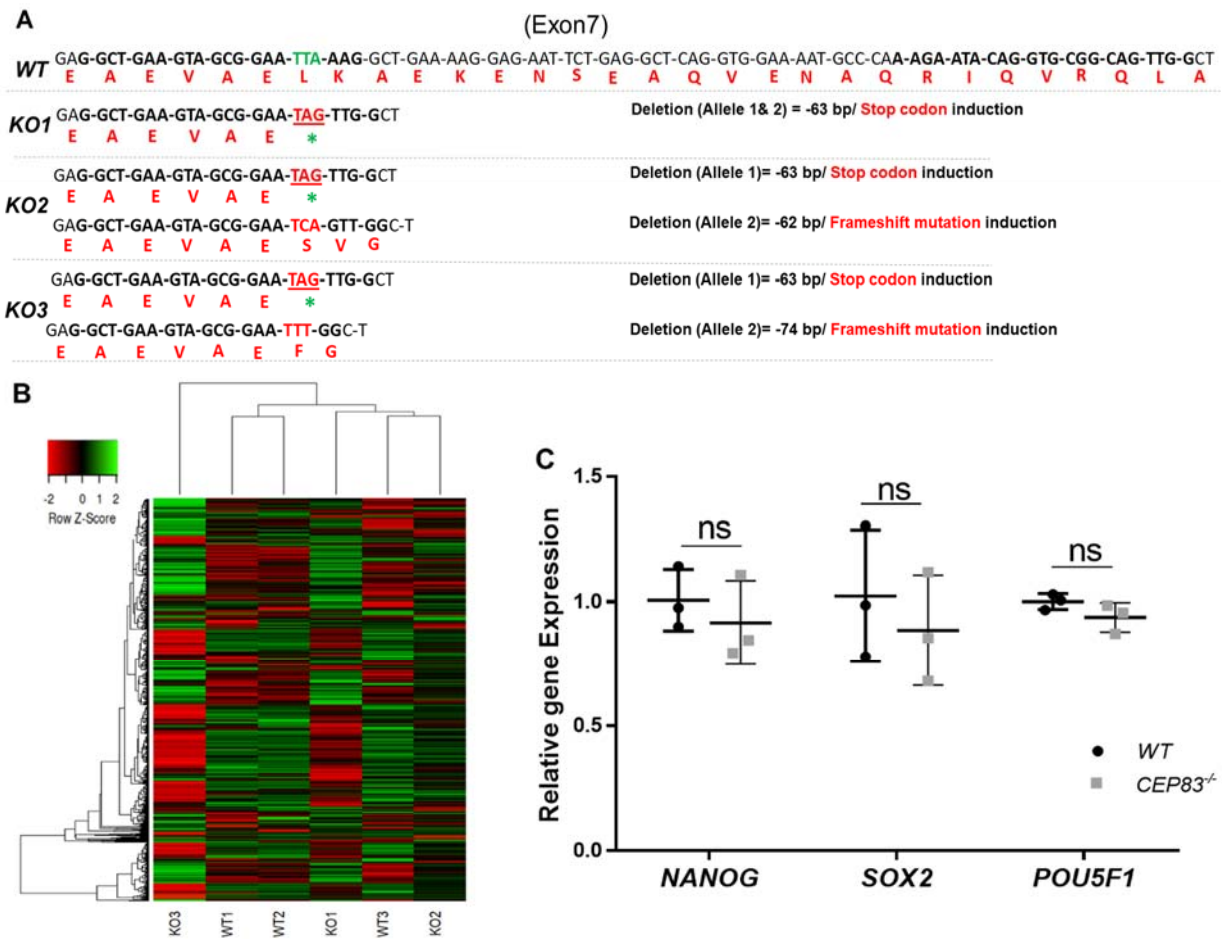

979 **Figure 1- figure supplement 1: *CEP83*<sup>-/-</sup> hiPSCs retain global iPCS cell gene expression**  
 980 **signatures and express pluripotency markers.** (A) Alignment of the modified KO clones mRNA  
 981 and expected amino acids sequences with WT revealed induction of stop codon on both strands  
 982 of KO1 clone. While KO2 clone shows induction of stop codon on one allele and frameshift  
 983 mutation within the second allele with 62 bp deletion. KO3 clone sequence shows induction of  
 984 stop codon on one allele and frameshift mutation with 74 bp deletion in the second allele. (B)  
 985 Heatmap showing the expression of the top 1000 highly variable genes (see method, with a  
 986 selection of TPM ≥ 10) within WT (WT1, WT2, and WT3) and CEP83<sup>-/-</sup> hiPSCs (KO1, KO2, and  
 987 KO3) clones. Unbiased hierarchical clustering of clones indicates that gene expression similarity  
 988 is not driven by WT or KO status. (C) RT-PCR shows no significant differences in the expression

989 of pluripotency markers *NANOG*, *SOX2*, and *POU5F1* between *WT* and *CEP83<sup>-/-</sup>* hiPSCs. TPM,  
 990 Transcripts Per Million. n = 3 hiPSCs clones per group. Data are mean ± SD. ns, not significant.

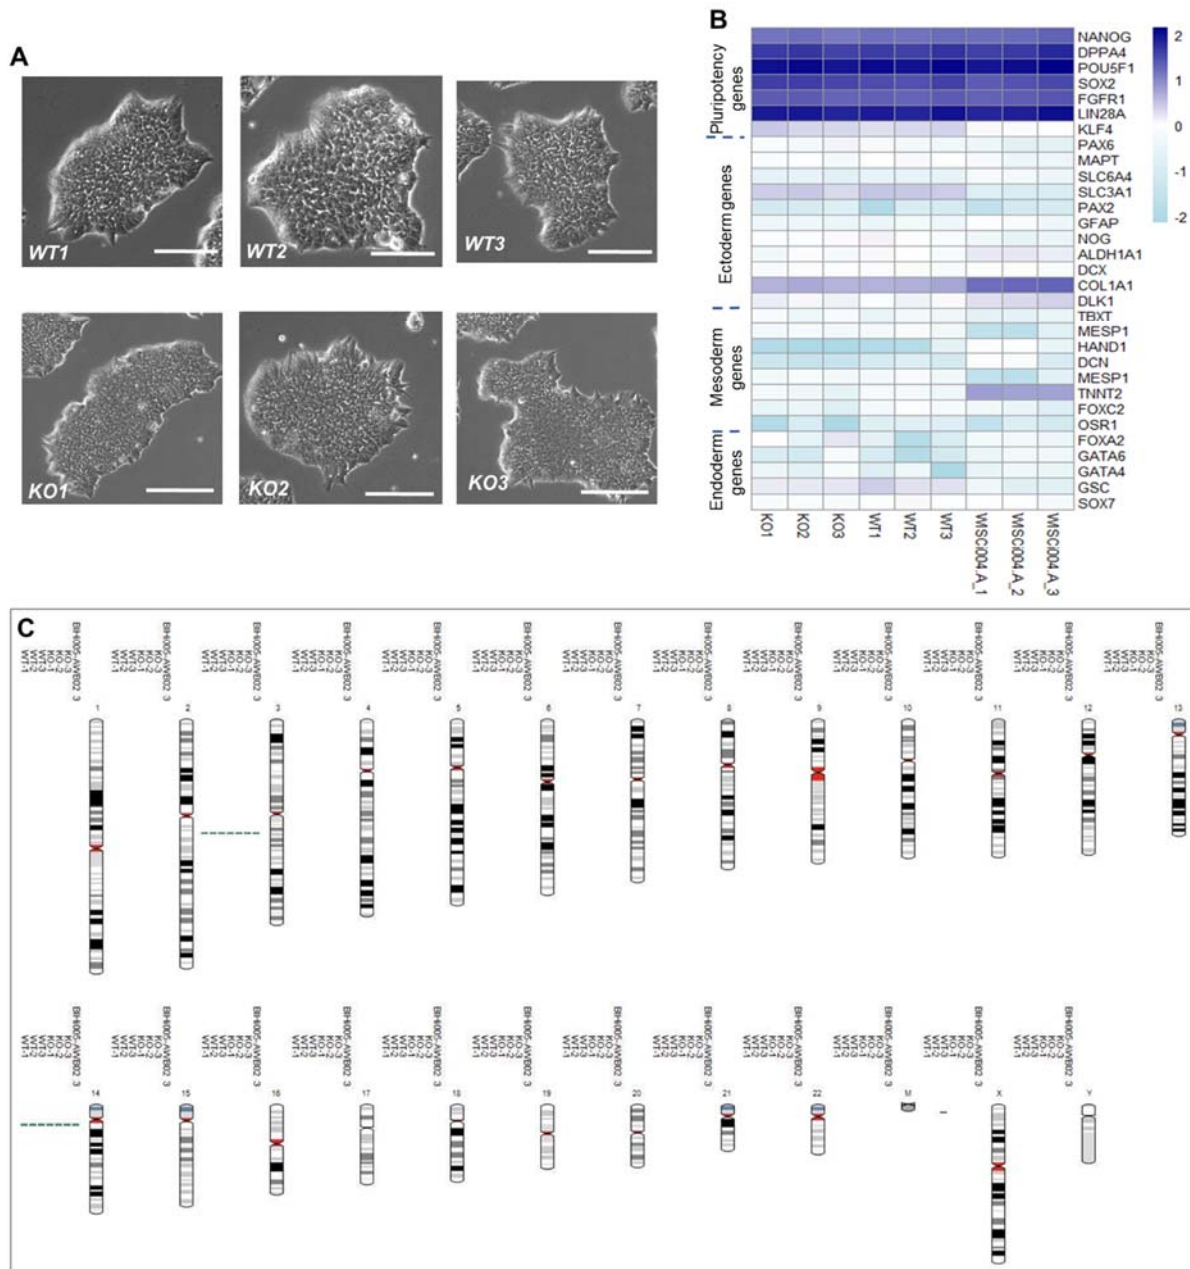

991 **Figure 1- figure supplement 2: Phenotypical, molecular and genetic characterization of**  
 992 ***CEP83<sup>-/-</sup>* hiPSCs versus the wildtype hiPSCs.** (A) *CEP83<sup>-/-</sup>* hiPSCs clones (*KO1*, *KO2*, and  
 993 *KO3*) show similar morphology to the *WT* clones (*WT1*, *WT2*, and *WT3*) under the bright field  
 994 microscope, scale bar= 200 μm. (B) Using bulk RNA sequencing data, TPM values for marker



995 genes for pluripotency, ectodermal, mesodermal, and endodermal cells were plotted across the  
996 samples (*KO1*, *KO2*, *KO3*, *WT1*, *WT2*, and *WT3*). In addition, gene expression of the 6 samples  
997 was compared to three wildtype hiPSCs (WISCI004-A, also referred to as IMR90-4 iPS derived  
998 from female lung fibroblasts) that were previously published<sup>1</sup>. (C) The three *WT* clones, three *KO*  
999 clones, and the parental population were karyotyped using single nucleotide polymorphism (SNP)  
1000 - analysis, demonstrating unaffected integrity of karyotypes. Two aberrations (one gain on Chr3  
1001 and one gain on Chr14) present in BIHi005-A were previously reported ([https://hpscereg.eu/cell-](https://hpscereg.eu/cell-line/BIHi005-A)  
1002 [line/BIHi005-A](https://hpscereg.eu/cell-line/BIHi005-A), Berlin Institute of Health Stem Cell Core Facility).

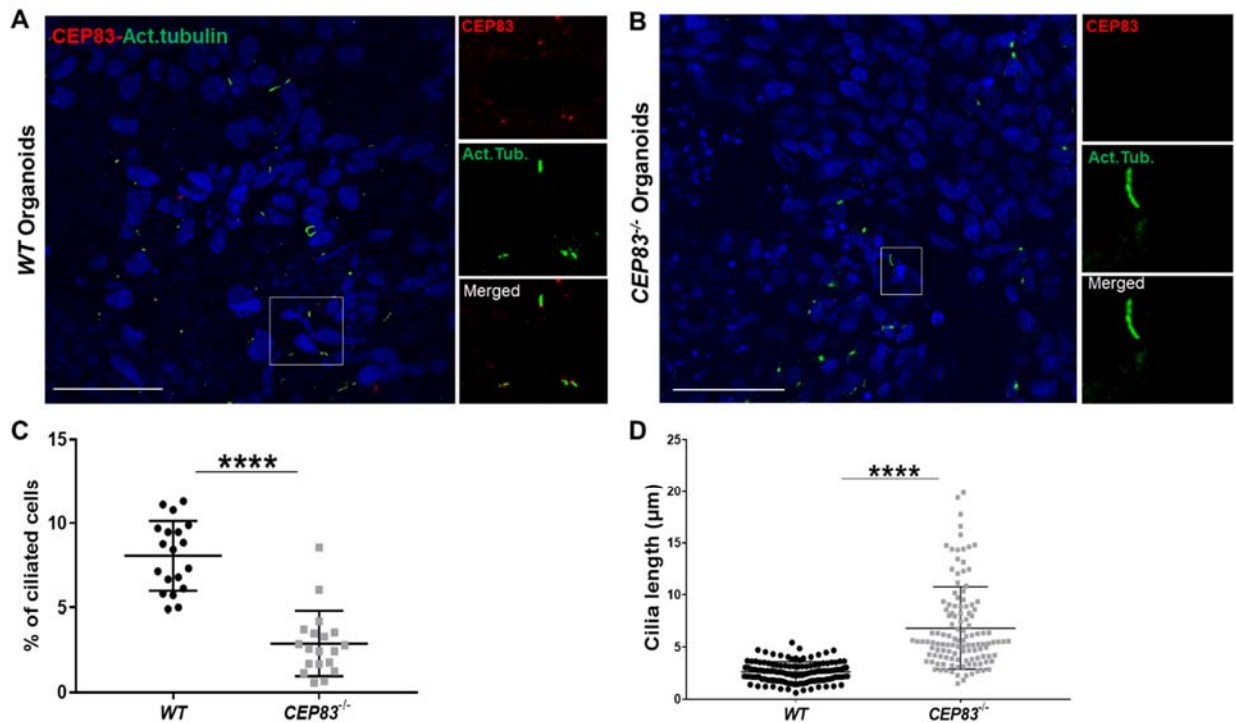

1003 **Figure 2- figure supplement 1: Loss of *CEP83* in organoids results in defective ciliogenesis.**

1004 (A) Immunofluorescence staining of WT and *CEP83*<sup>-/-</sup> organoids for acetylated tubulin (green),  
1005 *CEP83* protein (red), and nuclear staining (DAPI). Note *CEP83* localization at the base of the  
1006 cilium in WT organoids. (B) Quantitative analysis of ciliated cells showing downregulation of the  
1007 number of ciliated cells in *CEP83*<sup>-/-</sup> organoids, associated with longer cilium formation (C). n = 3  
1008 clones per group. Data are mean ± SD. \*\*\*\**P* < 0.0001. Panel A: Bar = 50 μm.

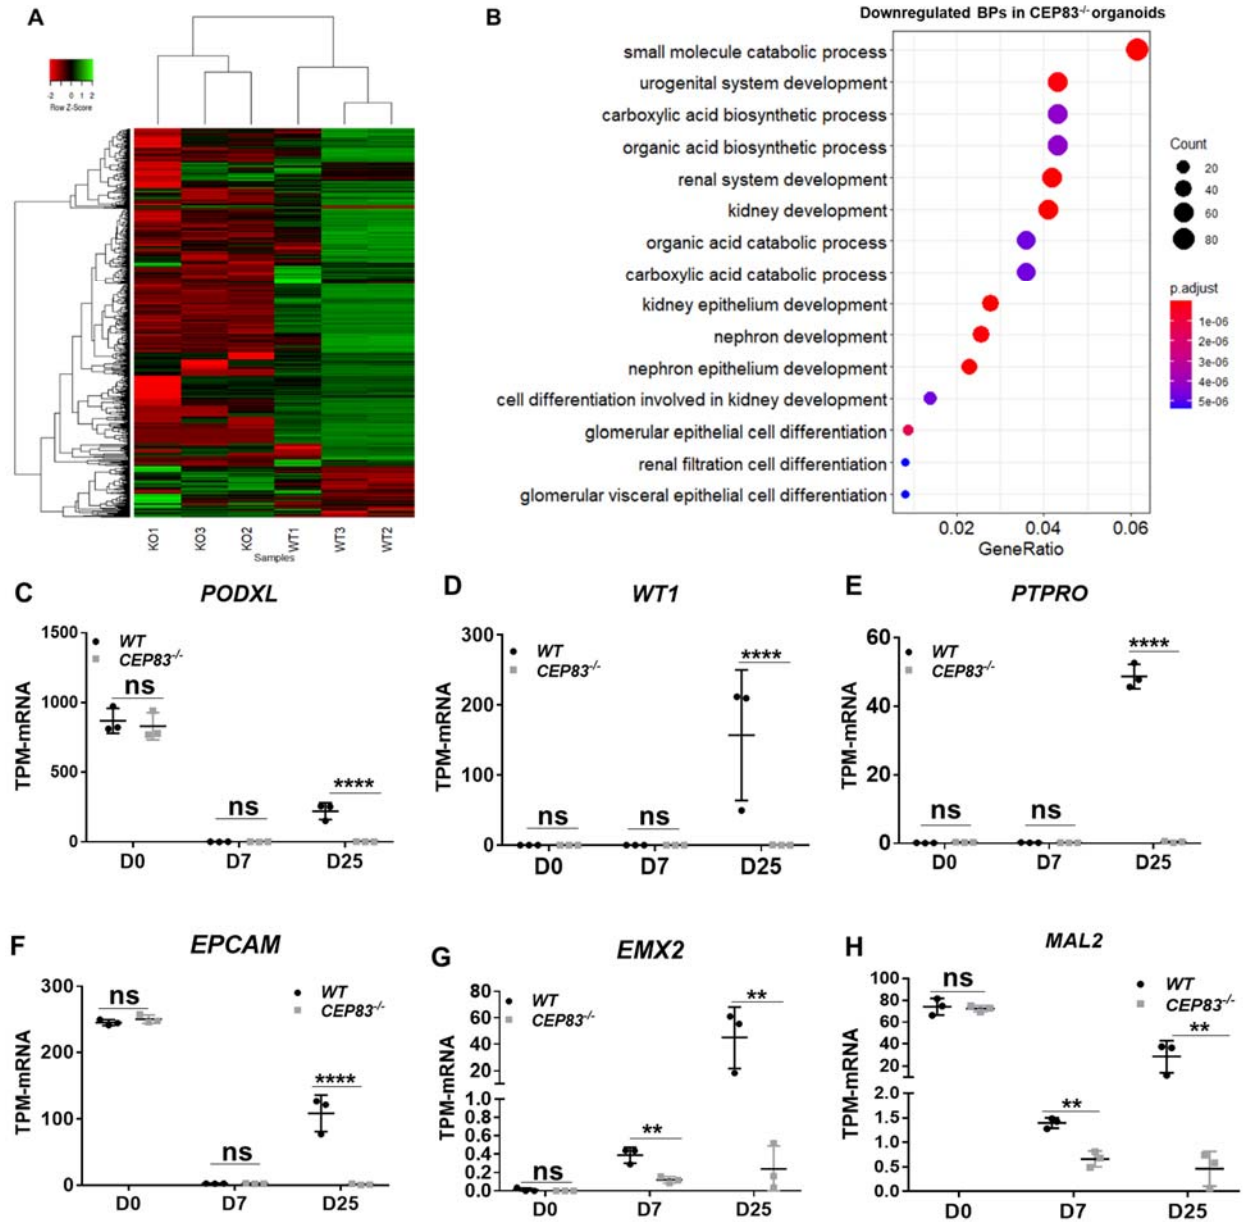

1009 **Figure 3- figure supplement 1: Bulk RNA-sequencing of organoids differentiated for 7+ (18)**  
1010 **days indicates marked differences in global gene expression in *CEP83*<sup>-/-</sup> (*KO1-KO3*)**  
1011 **compared to wildtype (*WT1-WT3*) organoids. (A) Heatmap displaying the expression of the top**  
1012 **1000 highly variable genes (see methods, TPM  $\geq$  10) within *WT* (*WT1, WT2, WT3*) and *CEP83*<sup>-/-</sup>**  
1013 **(*KO1, KO2, KO3*) organoids. Hierarchical clustering of clones indicating that global gene**  
1014 **expression is profoundly different in *WT* and *KO* organoids. Ontology analysis of the biological**  
1015 **processes (BPs) using the top 100 downregulated genes (based on fold change values) in *CEP83***

1016  $^{-/-}$  organoids (TPM >2, fold change > 1.5,  $P$ -value calculated on log<sub>10</sub> TPM < 0.05) using DOSE  
1017 and cluster profile packages in R<sup>2</sup>. The analysis shows downregulation of many biological  
1018 processes associated with kidney development in *CEP83* mutated organoids, as shown in the dot  
1019 plot (B). Bulk RNA sequencing shows downregulation of specific renal epithelial cells marker  
1020 genes at day 25, including (C-E) *PODXL*, *WT1*, and *PTPRO* for podocytes. (F- H) *EPCAM*, *EMX2*,  
1021 and *MAL2* marker genes for the distal nephron precursor cells.  $n = 3$  clones per group. Data are  
1022 mean  $\pm$  SD. \* $P < 0.05$ , \*\* $P < 0.01$ , and \*\*\*\* $P < 0.0001$ . ns= not significant.

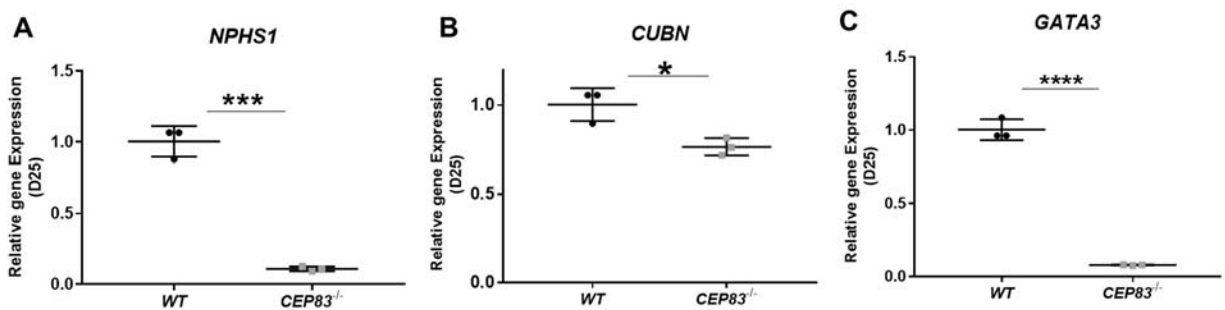

1023 **Figure 3- figure supplement 2:** RT-PCR shows that the expression of some nephron epithelial  
1024 markers, including *NPHS1* (Podocytes), *CUBN* (Proximal tubules), and *GATA3* (distal tubules  
1025 and collecting duct) was significantly downregulated in *CEP83*<sup>-/-</sup> organoids.  $n = 3$  clones per group.  
1026 Data are mean  $\pm$  SD. \* $P < 0.05$ , \*\*\* $P < 0.001$  and \*\*\*\* $P < 0.0001$ .

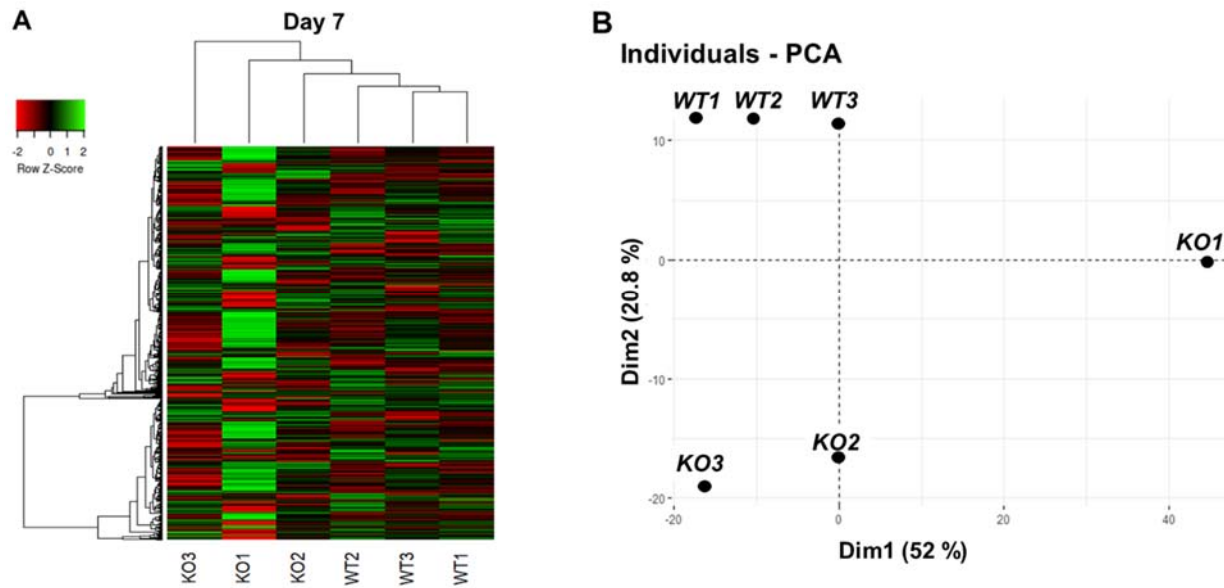

1027 **Figure 4- figure supplement 1: Bulk RNA sequencing shows mild overall gene**  
1028 **expression differences between WT and CEP83-deficient cells at day 7 of**  
1029 **differentiation.** (A) Heat map of bulk RNA-seq data showing the most highly variable 1000  
1030 genes (see methods, maximum TPM  $\geq$  10) within wildtype (*WT1*, *WT2*, and *WT3*) and *CEP83*<sup>-/-</sup>  
1031 (*KO1*, *KO2*, and *KO3*) clones at day 7 of differentiation. Unbiased hierarchical clustering of clones  
1032 separates *CEP83*<sup>-/-</sup> and *WT* transcriptomes. (B) Principal component analysis (PCA) of *WT* (*WT1*,  
1033 *WT2*, *WT3*) and *CEP83*<sup>-/-</sup> (*KO1*, *KO2*, *KO3*) cells at day 7 using the average gene expression of  
1034 the top highly variable 1000 genes in bulk RNA sequencing data. The % variation explained by  
1035 each PCA axis is indicated in brackets. PCA eigenvalues indicate that the principal components,  
1036 Dim 1 (52%) and Dim 2 (20.8%), account for 85.3 % of the expression differences. Dim 1  
1037 separates the *KO1* sample from the other samples, while Dim 2 separates experiment 1 (*WT1*,  
1038 *WT2*, *WT3*) and (*KO1*, *KO2*, *KO3*)

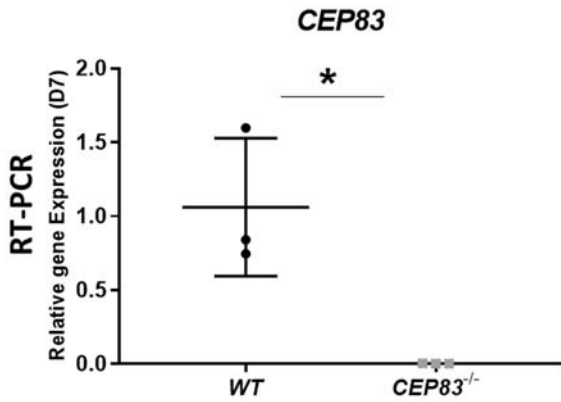

1039

1040 **Figure 4- figure supplement 2:** mRNA expression of *CEP83* was significantly downregulated in  
1041 the *CEP83*<sup>-/-</sup> clones at day 7. The expression was investigated in bulk RNA seq data and  
1042 confirmed by RT-PCR. n = 3 clones per group. Data are mean ± SD. \**P* < 0.05

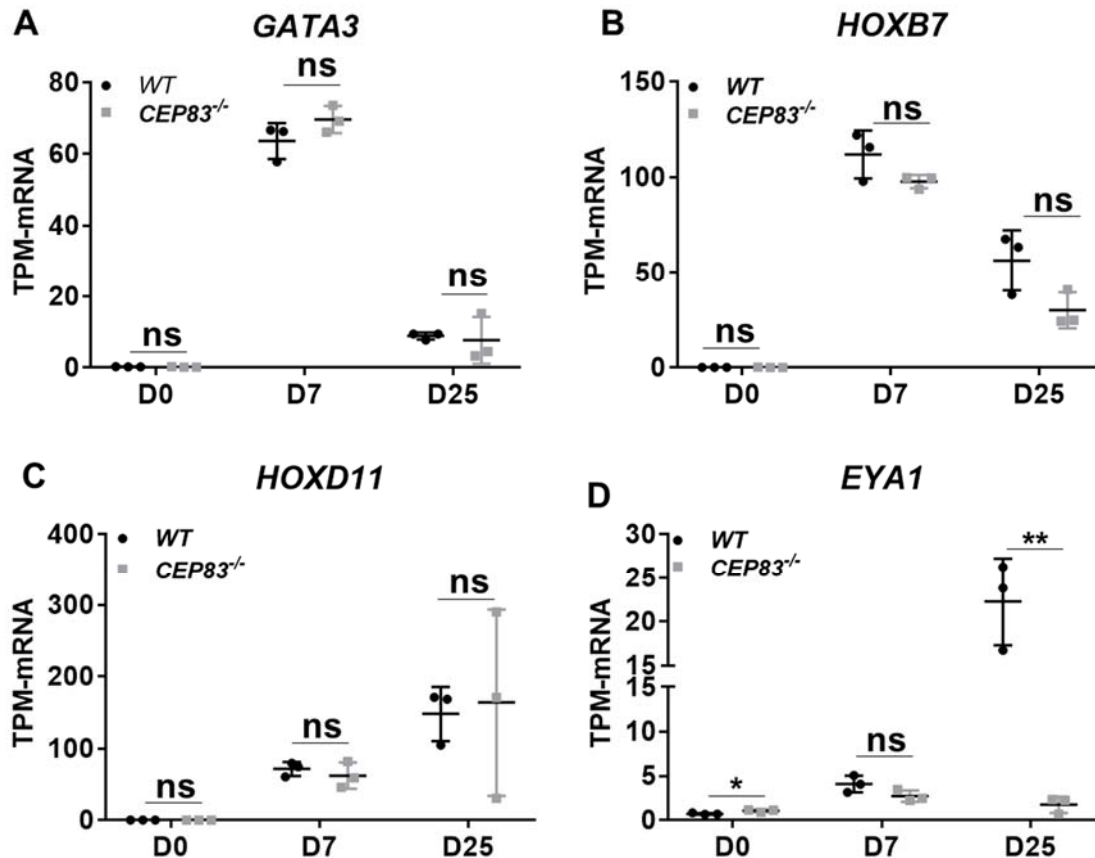

1043 **Figure 4- figure supplement 3:** Expression of intermediate mesoderm marker genes in *WT*  
1044 and *CEP83*<sup>-/-</sup> hiPSCs after 7 days of differentiation in a monolayer culture. (A-B) using Bulk



1045 RNA sequencing data, the expression of Ureteric bud (UB) marker genes including *GATA3*, and  
 1046 *HOXB7* shows no significant change between WT and mutated cells at day 0, 7, and 25. While,  
 1047 (C-D) MM marker genes including *HOXD11* and *EYA1* show no significant difference between  
 1048 WT and *CEP83*<sup>-/-</sup> cells at day 0, 7, 25 except *EYA1* show significant downregulation in the mutated  
 1049 cells at day 25. n = 3 clones per group. Data are mean ± SD. \*\**P* < 0.01. ns= not significant.

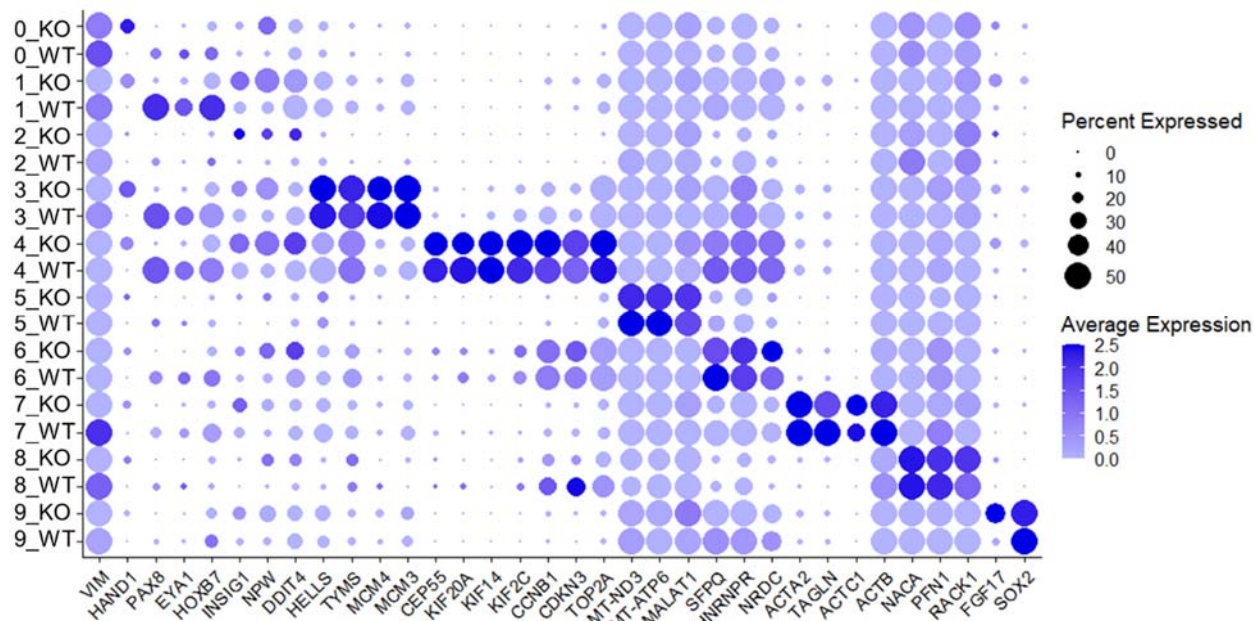

1050 **Figure 5- figure supplement 1: Dotplot shows the expression of marker genes of each**  
 1051 **cluster and the splitted expression per group (WT and KO).** Cluster 0 (Mesenchymal cells)  
 1052 expresses mesenchymal genes, including *VIM* and *HAND1*. *VIM*, vimentin encodes an  
 1053 intermediate filament protein that plays a role in cytoskeleton organization<sup>3,4</sup>. The basic Helix-  
 1054 Loop-Helix (*bHLH*) transcription factor *HAND1* is expressed in the lateral plate mesoderm  
 1055 populations, in the developing heart, and in a subset of neural crest cells<sup>5-7</sup>. Thus, interestingly,  
 1056 the expression of *HAND1* is mainly represented by the KO cells in this cluster. Cluster 1 (Nascent  
 1057 nephron-1) shows upregulation of the nascent nephron marker genes, including *PAX8*, *EYA1*,  
 1058 and *HOXB7*. *PAX8* is a member of the *Pax2/5/8* family and is expressed during pro-, meso-, and  
 1059 metanephros development<sup>8-10</sup>. Interestingly, *PAX2-PAX8* double-mutant mice embryos exhibited  
 1060 impaired kidney development<sup>11</sup>. Deficiency of human *EYA1*, a homolog of the *Drosophila*



1061 melanogaster gene eyes absent (*eya*), results in an inherited disorders branchio-oto-renal (BOR)  
1062 syndrome in human with or without kidney defects<sup>12,13</sup>. *EYA1* knockout in mice results in complete  
1063 renal agenesis<sup>14</sup>. *HOXB7* is one of HOX genes and is expressed in the mesonephros, ureter, and  
1064 collecting system. Thus, *HOXB7* plays an essential role in kidney development. Overexpression  
1065 of *HOXB7* in mice causes renal duplications<sup>15,16</sup>. The expression of *PAX8*, *HOXB7*, and *EYA1*  
1066 was observed additionally in clusters 3 and 4. Cluster 2 (Unknown cell type-1) is expressing  
1067 *INSIG1*, *NPW*, and *DDIT4*. The insulin induced gene 1 (*INSIG1*) encodes a protein that mediates  
1068 feedback control of cholesterol synthesis<sup>17</sup>. Neuropeptide W (*NPW*) is a gene that encodes  
1069 peptides that bind and activate two G-protein coupled receptors: *GPR7* and *GPR8* in the central  
1070 nervous system<sup>18</sup>. DNA damage inducible transcript 4 (*DDIT4*) gene is expressed under stress  
1071 turning off the metabolic activity triggered by the mammalian target of rapamycin (mTOR)<sup>19</sup>. Most  
1072 of the clusters express mainly cell cycle genes of different phases. Previous studies identified the  
1073 cell cycle genes for each phase<sup>20-23</sup>. For instance, cluster 3 (S- Phase nascent nephron-2) mainly  
1074 expresses the S- phase marker genes, including *HELLS*, *TYMS*, *MCM4*, and *MCM3* in addition  
1075 to the nascent nephron marker genes. Cells of cluster 4 (M- Phase nascent nephron-3) express  
1076 genes of the M- phase, including *CEP55*, *KIF20A*, *KIF14*, and *KIF2C*<sup>24</sup>. Besides, cluster 4  
1077 expresses the nascent nephron marker genes. In contrast, cluster 5 (damaged cells) includes the  
1078 damaged cells that mainly express mitochondrial genes expression as *MT-ND3*, *MT-ATP6*, and  
1079 *MALAT1*, and show the highest mitochondrial percent compared with other clusters. While,  
1080 Clusters 6 and 8 express proliferative genes that reach their peak of expression in G2/M phase  
1081 genes, including *CCNB1*, *CDKN3*, and *TOP2A*<sup>20-23</sup>. Besides the G2/M phase marker genes,  
1082 cluster 6 (G2/M Phase unknown cell type-2) expresses *SFPQ*, *HNRNPR*, and *NRDC*. Splicing  
1083 Factor Proline and Glutamine Rich (*SFPQ*) is a ubiquitous and abundant RNA-binding protein  
1084 with multiple regulatory roles in the nucleus<sup>25</sup>. Heterogeneous Nuclear Ribonucleoprotein R  
1085 (*HNRNPR*) promoted cancer cell proliferation by stabilizing the expression of *CCNB1* and *CENPF*  
1086 mRNA levels and promoting transcription at the proto-oncogene *c-fos*<sup>26,27</sup>. Nardilysin Convertase

1087 (*NRDC*) gene encodes an enzyme highly expressed in human developing adult brain<sup>28</sup>. We  
1088 couldn't identify the type of cells of this cluster according to its gene expression profile. Cluster 7  
1089 (Actins enriched) expresses genes that encode actin proteins, including *ACTA2*, *TAGLN*, *ACTC1*,  
1090 and *ACTB*, which are expressed in the cytoskeleton of the cell<sup>29,30</sup>. While, cluster 8 (G2/M Phase  
1091 unknown cell type-3) upregulates *NACA*, *PFN1*, and *RACK1*. The nascent-polypeptide-  
1092 associated complex alpha polypeptide (*NACA*) gene encodes a protein associated with basic  
1093 transcription factor 3 (*BTF3*) and acts as a potent Suppressor of protein aggregation and aging-  
1094 related proteinopathies<sup>31</sup>. Profilin 1 (*PFN1*) plays a crucial role in promoting actin polymerization  
1095 in cells<sup>32</sup>. Invitro study showed that receptor inhibition for activated C kinase 1 (*RACK1*) could  
1096 suppress cell proliferation and induce apoptosis<sup>33</sup>. While cluster 9 (*SOX2* enriched) is expressing  
1097 *FGF17* and *SOX2*. Fibroblast growth factor 17 (*FGF17*), a gene expressed in the developing brain  
1098 and involved in cerebellar vermis development<sup>34</sup>. Sex determining region Y-box 2 (*Sox2*) gene  
1099 plays a critical role in maintaining stem cell pluripotency and differentiation of pluripotent stem  
1100 cells into neural progenitor stem cells<sup>35</sup>. n = 2 clones per group.

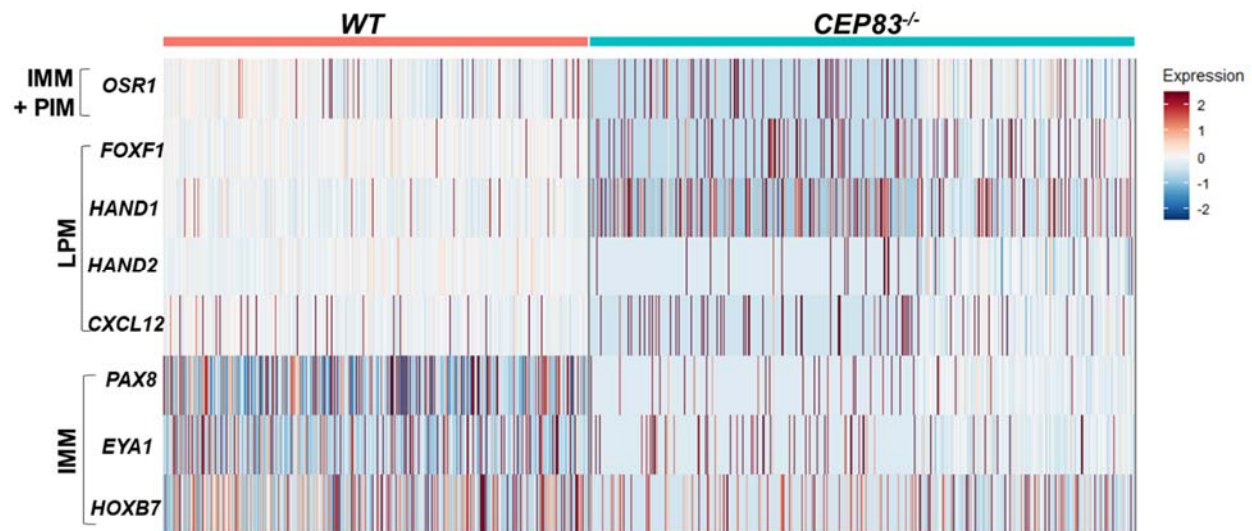

1101  
1102 **Figure 6- figure supplement 1: *CEP83*<sup>-/-</sup> cells upregulate LPM genes in mesenchymal cells**  
1103 **cluster and nascent nephron progenitor clusters.** The heatmap shows that the log fold change  
1104 of the average expression (default setting in Seurat package) of LPM and IMM genes in the WT

1105 cells (8,123 cell) and the knockout cells (10,431 cell) derived from the mesenchyme cells cluster  
 1106 (cluster 0) and the three nascent nephron clusters (1, 3, and 4). Scoring for cells expression for  
 1107 both LPM including: *FOXF1*, *HAND1*, *HAND2*, and *CXCL12*, and IMM genes including: *PAX8*,  
 1108 *EYA1*, and *HOXB7* were done in R. Each cell was scored 0- 4 for LPM genes expression. 0, 1, 2,  
 1109 3 and 4 mean that cell express no LPM genes, 1 gene, 2 genes, 3 genes, and 4 genes,  
 1110 respectively. Statistical analysis comparing between LPM scores for *WT* and *KO* cells using  
 1111 wilcoxon rank sum test, showed that *KO* cells significantly upregulate the expression of LPM  
 1112 genes. The same scoring analysis was done for the expression of the IMM genes, where the cells  
 1113 got score from 0 to 3 for IMM genes expression. Interestingly, the *KO* cells showed significant  
 1114 downregulation of the IMM genes expression.

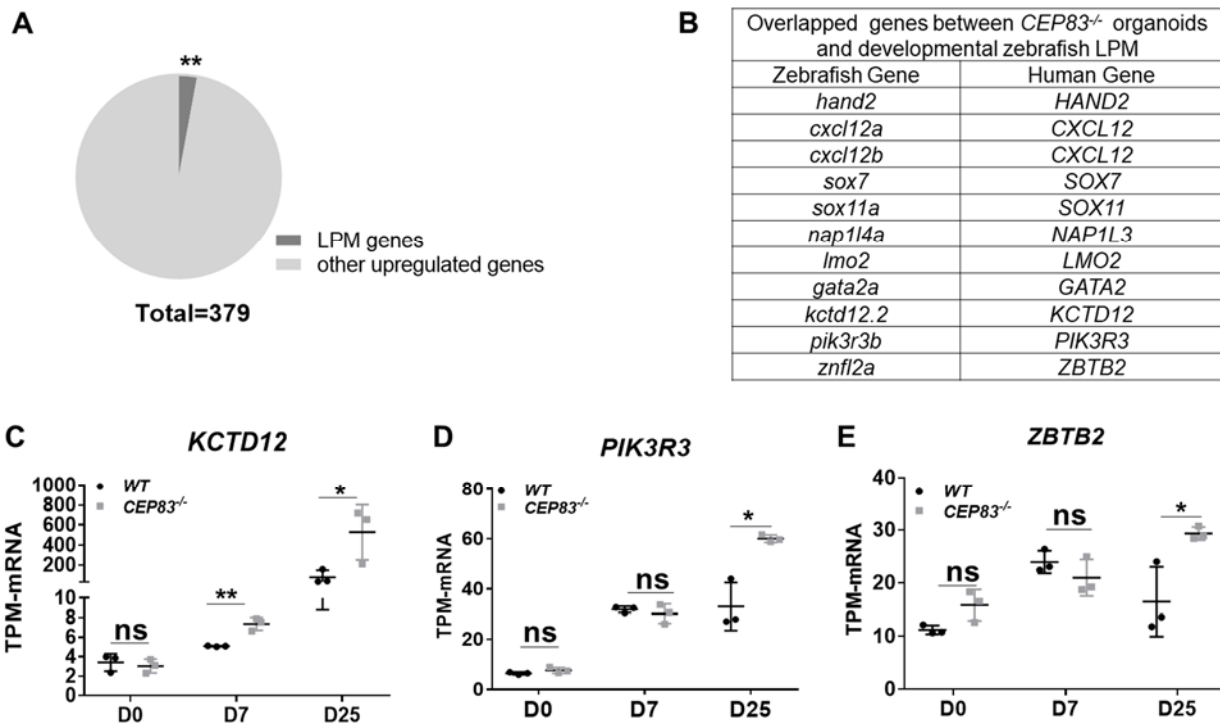

1115 **Figure 6- figure supplement 2: *CEP83*<sup>-/-</sup> organoids shows significant enrichment compared**  
 1116 **to developmental zebrafish LPM scRNA data.** The expression of the upregulated genes by  
 1117 *CEP83*<sup>-/-</sup> organoids at day 25 were compared with the top 20 genes per cluster of zebrafish  
 1118 LPM scRNA data (Prummel et al., 2020). The analysis showed significant enrichment (A), with 11

1119 zebrafish genes overlapped with 10 human genes (B). C, D, and E show the significant  
1120 upregulation of three overlapped genes with zebrafish LPM including KCTD12, PIK3R3 and  
1121 ZBTB2 respectively. n = 3 clones per group. Data are mean  $\pm$  SD. \* $P < 0.05$ , and \*\* $P < 0.01$ . ns=  
1122 not significant.

1123

## 1124 **Supplemental Methods**

### 1125 **hiPSCs Culture.**

1126 We used the human iPSC cell line BIHi005-A, which was generated from a healthy donor  
1127 by the Berlin Institute of Health (BIH) and supplied by the stem cell core facility at Max  
1128 Delbrück Center for Molecular Medicine (Berlin). The hiPSCs were maintained in 6-well  
1129 plates (Corning®, 353046) coated with Matrigel (Corning®, 354277) and cultured in  
1130 Essential 8 medium (E8, Gibco-Thermo Fisher Scientific, A1517001) supplemented with  
1131 10 $\mu$ M Y-27632 (Rocki, Wako, 253-00513). The cells were split twice per week using  
1132 EDTA/PBS or Accumax™ (Stem cell technology, 07921).

### 1133 **CRISPR CAS9 Technology to generate CEP83<sup>-/-</sup> hiPSCs clones.**

1134 Clustered Regularly Interspaced Short Palindromic Repeats (CRISPR)-Cas9 technology  
1135 was used to generate CEP83<sup>-/-</sup> hiPSCs clones. Two 20 bp-long CRISPR RNAs (crRNAs)  
1136 were designed using CRISPOR software<sup>36</sup> to selectively target exon7: (5'-  
1137 GGCTGAAGTAGCGGAATTAA-AGG-3'); (5'-AAGAATACAGGTGCGGCAGT-TGG-3').  
1138 The crRNAs were ordered from Integrated DNA Technologies (IDT). The crRNAs (IDT)  
1139 were annealed in equimolar concentrations with trans-activating CRISPR RNA  
1140 (tracrRNA) to form two guide RNAs (gRNA1 and gRNA2), which were then conjugated  
1141 separately with Alt-R® S.p. Cas9 Nuclease V3 (1  $\mu$ M concentration, IDT, 1081058) at

1142 room temperature for 1 hour to form ribonucleoprotein (RNP) complexes (RNP1 and  
1143 RNP2).

1144 One day prior to transfection, hiPSCs were split using Accumax™ solution and cultured  
1145 in an equal proportion of E8 medium and StemFlex™ medium (Thermo Fisher Scientific,  
1146 A3349401). The hiPSCs were transfected using a Neon transfection system (Thermo  
1147 Fisher Scientific, MPK5000). Immediately before the transfection, the cells were  
1148 dissociated, collected, and resuspended in Resuspension Buffer (Buffer R), that included  
1149 in Neon™ transfection 100 µl kit (Thermo Fisher Scientific, MPK10025)<sup>37</sup>. Cells were  
1150 transfected in 3 ml Electrolytic buffer (Buffer E), that included in the neon transfection kit  
1151 , and by using the Neon transfection system 10µl tip. The used Neon Transfection  
1152 parameters were voltage (1200 V), width (30 ms), and pulse (1). The transfected cells  
1153 were cultured in StemFlex™ Medium with Rocki for 48 hours.

1154 Then, quick DNA extraction and PCR were then done to test transfection efficiency  
1155 according to the manufacturer's instructions using Phire™ Tissue Direct PCR Master Mix  
1156 (Thermo Scientific, F170S). The size of the PCR products were visualized on 1.5%  
1157 agarose gel. After confirming the transfection's success in the knockout cells, as shown  
1158 in **Figure 1B**, the cells were dissociated and seeded at low densities for 24 hours. Then,  
1159 twenty-four single cells were picked under a picking hood S1 (stem cell core facility-MDC,  
1160 Buch) and cultured in StemFlex™ medium for two weeks. The clones were then tested  
1161 for CEP83 mutation on the DNA level by PCR using Phire™ Tissue Direct PCR Master  
1162 Mix. Finally, the selected clones were expanded and frozen in the Bambanker medium  
1163 (Nippon Genetics, BB01) for further characterization. The selected clones were  
1164 characterized for the mutation induction on the DNA, protein, and RNA level.

1165 **Differentiation Protocol.**

1166 We used the protocol of **Takasato** to differentiate the hiPSCs into nephron  
1167 organoids<sup>38</sup>, the experiment was performed using three replicates per each  
1168 group wildtype hiPSCs (*WT1*, *WT2*, and *WT3*) and *CEP83*<sup>-/-</sup> hiPSCs (*KO1*,  
1169 *KO2*, and *KO3*). Two days prior to the differentiation, cultured hiPSCs on  
1170 matrigel with 70-80% density were prepared for the differentiation. The cells  
1171 were washed twice with 1x Dulbecco's PBS (Thermo Fisher Scientific, 14190-  
1172 250), then cells were trypsinized using 1x TrypL E Select (Thermo Fisher  
1173 Scientific, 12563011). Cells were incubated at 37 °C for 3 minutes. Then,  
1174 DMEM/F-12 medium (Thermo Fisher Scientific, 11320-033) were added on the  
1175 cells to neutralize TrypL E. The cell suspension was were mixed by pipetting  
1176 (pipetting is maximum twice), then centrifuged at 300g for 5 minutes. The cell  
1177 pellet was washed and resuspended in 1 ml of E8 medium. Then the cells was  
1178 counted using Countess® chamber slide and Countess II Automated Cell  
1179 Counter (Thermo Fisher Scientific). Then cells were centrifuged and  
1180 resuspended in E8 media supplemented with 10µM Rocki. Lastly, cells were  
1181 cultured on a prepared coated matrigel six well culture plates to obtain a  
1182 density of  $15 \times 10^3$  cells per  $\text{cm}^2$ , and incubated overnight at 37°C CO<sub>2</sub>  
1183 incubator for 48 h with daily medium change.

1184 Immediately before the differentiation, the cells were checked under microscope. Cells  
1185 with 40–50% confluency were used for the differentiation. The E8 medium was changed  
1186 into APEL2 medium (Stem Cell Technologies, 05270) with 5% Protein Free Hybridoma  
1187 Medium II (PFHMII, GIBCO, 12040077) and 8 µM CHIR99021 (2 ml medium per a well



1188 of 6- well plate). Cells were incubated in a 37 °C CO<sub>2</sub> incubator for **5d**, with medium  
1189 refreshing every 2d. Following the CHIR99021 phase, the medium was changed into  
1190 double volume of APEL2 medium (4 ml medium per a well of 6- well plate) supplemented  
1191 with 200 ng/ml FGF9 (R&D, 273-F9-025) and 1 µg/ml heparin (Sigma Aldrich, H4784-  
1192 250MG), and were incubated in a 37°C CO<sub>2</sub> incubator.

1193 On day 7 of differentiation, the cells were washed, trypsinized with trypsin EDTA (0.05%),  
1194 and incubated at 37°C for 3 min. Then, the cell suspension was transferred to a 50-ml  
1195 tube containing 9 ml of MEF conditioned medium ( R&D, AR005) to neutralize the trypsin.  
1196 The cells were centrifuged and resuspend in APEL2 medium. Using a hemocytometer,  
1197 the cells were counted and the cell suspension was divided to achieve 1×10<sup>6</sup> cells  
1198 (organoid) per 1.5 ml tube. All the tubes were centrifuged at 400xg for 3 min at RT. During  
1199 centrifugation, Six-well Transwell cell culture plates (Corning-Sigma Aldrich, CLS3450-  
1200 24EA) were prepared by adding 1.2 ml of APEL2 supplemented with 5 µM CHIR99021 to  
1201 each well. Cell pellets were picked up by using a P1,000 or P200 wide-bore tip. Pellets  
1202 were carefully seeded onto the six-well Transwell membrane with minimal APEL2  
1203 medium carryover, and incubated at 37°C for 1h. Then the medium were changed into  
1204 APEL2 medium supplemented with 200 ng/ml FGF9 plus 1 µg/ml heparin for further 5  
1205 days, with medium refreshing every 2 days. Finally, the medium to APEL2 medium with  
1206 only heparin for further 13 days, with medium refreshing every 2 days.

#### 1207 **DNA isolation and Polymerase Chain Reaction (PCR).**

1208 Cultured *WT* and *CEP83<sup>-/-</sup>* hiPSCs were washed, scrapped gently using a cell scraper  
1209 (VWR, part of Avantor, 734-2602), collected with a maximum 5×10<sup>6</sup> cell/ml for proper DNA  
1210 extraction. The DNA was extracted using DNeasy Blood & Tissue Kits (Qiagen, 69504)

1211 following the manufacturer's instructions. The concentrations and quality of the DNA were  
1212 evaluated using Nanodrop (Thermo Scientific, Waltham, MA; USA). To detect CEP83  
1213 expression, 200 µg DNA was amplified by a standard Polymerase Chain Reaction (PCR)  
1214 using Phusion high-fidelity DNA polymerase (Biolabs, New England, M0530). The master  
1215 mix was calculated according to the manufacturer's instructions. Primers are designed  
1216 using Primer3 webtool, Table S1. PCR was carried out in a thermocycler as follow: initial  
1217 denaturation at 98°C for 30 sec, 35 to 40 cycles of 30 sec at 98°C, 30 sec at 63.5 °C and  
1218 30 sec at 72°C; final elongation step at 72°C for 10 min. The PCR results were checked  
1219 on 1.5% agarose gel and analyzed using a BioDoc Analyze dark hood and software  
1220 system (Biometra).

#### 1221 **RNA isolation, RNA Sequencing, and Quantitative PCR (qPCR).**

1222 Total RNA was isolated from the cells at three time points: day 0 (hiPSCs), day 7 (IMM),  
1223 and day 25 (organoids) with a maximum of  $1 \times 10^7$  cells using RNAasy Mini Kit (QIAGEN,  
1224 Hilden, Germany, 74104,) following the manufacture instructions. The RNA was treated  
1225 with RNase-free DNase I (QIAGEN, 79254) for 15 minutes at room temperature during  
1226 the extraction. The concentration, quality, and integrity of the extracted RNA were  
1227 evaluated using Nanodrop (Thermo Scientific, Waltham, MA; USA), an Agilent 2100  
1228 Bioanalyzer, and the Agilent RNA 6000 Nano kit (5067-1511, Agilent Technologies). More  
1229 than 0.4 µg total RNA with high integrity (more than 6.8) and high purity ( $OD_{260/280} =$   
1230  $1.8-2.2$  and  $OD_{260/230} \geq 1.8$ ) were collected and sent for Illumina NovaSeq 6000RNA  
1231 sequencing by Novogene. RNA-Seq library preparation and next-generation sequencing:  
1232 cDNA libraries with paired-end 150 bp enriched were prepared by Novogene. Firstly the  
1233 mRNA was randomly fragmentated and supplemented with oligo (dT) beads. Then cDNA

1234 synthesis were done using the random hexamers and reverse transcriptase. Secondly,  
1235 second-strand synthesis was done using: a custom second-strand synthesis buffer from  
1236 Illumina, deoxyribose nucleoside triphosphates (dNTPs), RNase H and E.coli polymerase  
1237 I. The final obtained cDNA library was purified, terminally repaired, A-tailed, ligated to  
1238 sequencing adapters, size-selected, and PCR-enriched. Quantification of library  
1239 concentration was performed using a Qubit 2.0 fluorometer. Library size was measured  
1240 by Agilent 2100 bioanalyzer and was quantified by qPCR (library activity > 2 nM). Libraries  
1241 were sequenced on Illumina NovaSeq 6000 S4 flow cells (paired end, 150bp).

1242 Raw data were transformed to sequenced reads, and recorded in a FASTQ file. FASTQ  
1243 files were aligned to build 19 of the human genome provided by the Genome Reference  
1244 Consortium (GRCh19) performed by Christian Hinze using TOPHAT2 aligner tool<sup>39</sup>. Up  
1245 to 4 mismatches with the reference genome were accepted. Raw counts were obtained  
1246 using featureCounts<sup>40</sup>. Mutation visualization in the knockout samples was performed  
1247 using the Integrative Genomic Viewer (IGV) tool<sup>41</sup>. For gene expression analysis reads  
1248 were normalized to the sequence length and transcripts per million (TPM) values were  
1249 calculated<sup>42</sup>. TPM values of the samples were used to plot heatmaps and for PCA  
1250 analysis based on Pearson correlation, using R (R Development Core Team, 4.0.4)

1251 500 ng of RNA was reverse transcribed using the RevertAid First Strand cDNA synthesis  
1252 kit (Thermo Scientific, K1622) according to the manufacturer's instructions. The qPCR  
1253 was carried out using the Fast Universal SYBR Green Master Mix (ROX, Roche  
1254 Diagnostics, 04 913 850 001,) according to the manufacturer's instructions. For  
1255 expression analysis, relative mRNA expression levels were normalized for GAPDH  
1256 mRNA expression and calculated according to the  $\Delta\Delta C_t$  method. All primer pairs were

1257 designed using the free-online primer design tool Primer3, purchased at BioTeZ (Berlin,  
1258 Germany), and sequences are shown in (Table S1). Statistical significance of differences  
1259 between two groups (WT and KO) was analyzed using two-sided Student's t-test.

## 1260 **Single cell RNA (scRNA) experiment.**

### 1261 **Cells isolation and preparation**

1262 The differentiated hiPSCs to intermediate mesodermal cells were collected at day 7 of  
1263 the differentiation from two different experiments. The cells of the first experiment were  
1264 derived from *WT1* and *KO1* differentiated hiPSCs, while the second experiment  
1265 comprises the differentiated cells of *WT2* and *KO2* cells. The cells were washed twice  
1266 with 1X DPBS and dissociated with Accumax for 7 min at 37 °C. Cells were centrifuged  
1267 at 350 × g for 5 min, and resuspended in 1X DPBS. Then, cells were filtered a 40 µm filter  
1268 (Corning, 352340), counted (10,000 cells per sample), and checked for viability using  
1269 Trypan blue staining.

### 1270 **Protein extraction and Immunoblotting.**

1271 Protein extraction: Up to  $1 \times 10^6$  hiPSCs per sample (*WT1*, *WT2*, *WT3*, *KO1*, *KO2*, and  
1272 *KO3*) were washed with cold 1xPBS, then centrifuged at 3500 g for 5 minutes. Next, the  
1273 cell pellet was resuspended in pre-ice cold 100 µl of radioimmunoprecipitation assay  
1274 (RIPA) buffer (Sigma-Aldrich, R0278) supplemented with protease inhibitor (Roche,  
1275 11697498001) and maintained with constant agitation for 30 min at 4°C. Then the  
1276 suspension was centrifuged at 4°C for 20 minutes at 12,000 rpm. The supernatant was  
1277 collected as protein extract and quantified using BCA Protein Assay (Thermo Scientific,  
1278 23228).

1279 Immunoblotting: 30 µg of the extracted protein in RIPA buffer were mixed with 1x reducing  
1280 (10% b-mercaptoethanol) NuPAGE loading buffer (Life Technologies, Carlsbad, CA).  
1281 After denaturation at 70°C for 10 min. The protein was loaded on a precast  
1282 polyacrylamide NuPage 4-12% Bis-Tris protein gel (Invitrogen, Carlsbad, CA, USA) and  
1283 1x MOPS (1M MOPS, 1M TrisBase, 69.3mM SDS, 20.5mM EDTA) to be separated  
1284 according to the length using SDS -PAGE (100V, 200mA, 2h). Proteins were blotted on  
1285 0.45 µm pore size Immobilon-P Polyvinylidene difluoride (PVDF) membrane (EMD  
1286 Millipore, Billerica, MA; USA). The membrane was pre-activated for 20 sec in methanol  
1287 and equilibrated in 1X NuPage Transfer buffer (1.25 mM bicine, 1.25 mM BisTris, 0.05  
1288 mM EDTA, and 10% ethanol) for 30 min at RT. The membrane was blocked in 5% bovine  
1289 serum albumin for 1 h at RT and incubated overnight at 4°C with primary antibodies: Anti-  
1290 CEP83 produced in rabbit (1:500, Sigma-Aldrich) and Anti-α-Tubulin produced in mouse  
1291 (1:500, T9026, Sigma-Aldrich). The membrane was incubated for 1 h at RT with  
1292 horseradish peroxidase-conjugated secondary antibodies (Sigma-Aldrich, Saint Louis,  
1293 MO, USA) with 1:2000 dilution. Chemiluminescent reagent (Super Signal–West Pico;  
1294 Thermo Scientific, Waltham, MA; USA) was used to detect the proteins. The spectra™  
1295 Multicolor Broad Range Protein Ladder (Thermo Fisher Scientific, USA) was used to  
1296 evaluate the molecular weight of corresponding protein bands.

### 1297 **Histology and Immunofluorescence (IF) staining.**

1298 After organoid fixation in BD Cytofix buffer (554655, BD Biosciences) for 1 hour on ice,  
1299 the organoids were gradually dehydrated in increasing ethanol concentrations for 15  
1300 minutes each. Then organoids were cleared in xylene for three times 20 minutes each.  
1301 After infiltration with melted paraffin at 65°C three times for 30 minutes each, the

1302 organoids were embedded in paraffin and processed in 3.5  $\mu\text{m}$ -thick sections using a HM  
1303 355S microtome. The sections were deparaffinized, dehydrated, and stained with  
1304 hematoxylin (Sigma-Aldrich, Saint Louis, MO) for 3 minutes and in 1% eosin (Sigma-  
1305 Aldrich) for 2 minutes. The sections were mounted using Kaiser's glycerol gelatin-based  
1306 mounting medium. Images were captured with a Leica CTR 6000 microscope (Leica  
1307 Biosystems, Wetzlar, Germany).

1308 For immunostaining, cultured cells (D7) and organoids (D25) were fixed with BD Cytofix  
1309 for 10 minutes on ice. Then cells were permeabilized with BD Perm/Wash (554723, BD  
1310 Biosciences), twice, 15 minutes per each. Cells were blocked with blocking solution (1%  
1311 BSA + 0.3% triton-X-100 in 1X DPBS) for 2 hours at RT or overnight at 4°C. Cells were  
1312 incubated overnight at 4°C with primary antibodies (table S2). Cells were then washed  
1313 twice (10 min each) and incubated with fluorescence-labeled secondary antibodies with  
1314 1:500 dilution including Cy3, Cy5, Alexa488, and Alexa647 (Jackson ImmunoResearch,  
1315 Newmarket, UK) and Cy3 Streptavidin (Vector lab, Burlingame, USA) overnight at 4°C.  
1316 DAPI was then used for nuclear staining (Cell signaling Technology, Danvers, MA, USA)  
1317 with 1:300000 dilution for 1 hour at RT. Finally, cells were mounted with Dako fluorescent  
1318 mounting medium (Agilent Technologies). The images were taken using a SP8 confocal  
1319 microscope (Carl Zeiss GmbH, Oberkochen, Germany). All the quantitative analyses of  
1320 the taken images were performed using ImageJ (1.48v; National Institutes of Health,  
1321 Bethesda, MD) software.

1322

1323 **Supplemental Tables:**



1324 **Table S1: Primers list used in the qPCR.**

| Gene               | Forward primer sequence (5' →3') | Reverse primer sequence (5' →3') |
|--------------------|----------------------------------|----------------------------------|
| <i>CEP83</i>       | AGACAGCAAACGAGTGAAC              | GGATCTGACTGTAGCCTGCA             |
| <i>OSR1</i>        | CCTTCCTTCAGGCAGTGAAC             | CGGCACTTTGGAGAAAGAAG             |
| <i>GAPDH</i>       | AGCCACATCGCTCAGACAC              | GCCCAATACGACCAAATCC              |
| <i>OCT4/POU5F1</i> | AGCAAAACCCGGAGGAGT               | CCACATCGGCCTGTGTATATC            |
| <i>NANOG</i>       | AAGGCCTCAGCACCTACCTA             | ATTGGAAGGTTCCCAGTCGG             |
| <i>SOX2</i>        | CAAAAATGGCCATGCAGGTT             | AGTTGGGATCGAACAAAAGCTATT         |
| <i>HOXD11</i>      | CAGCAGCGCAGTTGCC                 | CGGTCAGTGAGGTTGAGCAT             |
| <i>EYA1</i>        | AACAGCTCACCGTATCCAGC             | TGTGCTGTA CTCTGCTGTGG            |
| <i>GATA3</i>       | GCCCCTCATTAAGCCCAAG              | TTGTGGTGGTCTGACAGTTCCG           |
| <i>HOXB7</i>       | AAGCTCAGGAACTGACCGC              | CCCTGTCTTGGCCGGTG                |
| <i>PODXL</i>       | CAACCCGGCCCAAGATAAGT             | GGCAGGGAGCTTAGTGTGAA             |
| <i>CUBN</i>        | CTGCCGTCTTCCAGTCTCAG             | ACAGCGGAACGAGCTTCTAA             |

1325

1326 **Table S2: Primary antibodies used in IF staining.**

| Antibody                                                    | Dilution   | Company                             |
|-------------------------------------------------------------|------------|-------------------------------------|
| Monoclonal Anti-Tubulin, acetylated antibody (T6793). mouse | IF: 1:2000 | Sigma-Aldrich, Saint Louis, MO, USA |
| anti-Cdh1                                                   | IF: 1:200  | BD Bioscience, San Jose, CA, USA    |
| Lotus tetragonolobus lectin (LTL)                           | IF: 1:200  | Vector lab, Burlingame, USA         |
| Anti-NPHS1                                                  | IF: 1:300  | R&D System, Minneapolis, MN, USA    |
| Anti- CEP83                                                 | IF: 1:200  | Sigma-Aldrich, Saint Louis, MO, USA |

1327

1328 **Supplemental References:**

- 1329 1 Hariharan, K., Stachelscheid, H., Rossbach, B., Oh, S.-J., Mah, N., Schmidt-Ott,  
1330 K., Kurtz, A. & Reinke, P. Parallel generation of easily selectable multiple  
1331 nephronal cell types from human pluripotent stem cells. *Cellular and Molecular Life  
1332 Sciences* **76**, 179-192, doi:10.1007/s00018-018-2929-2 (2019).
- 1333 2 Yu, G., Wang, L. G., Han, Y. & He, Q. Y. clusterProfiler: an R package for  
1334 comparing biological themes among gene clusters. *Omics : a journal of integrative  
1335 biology* **16**, 284-287, doi:10.1089/omi.2011.0118 (2012).
- 1336 3 May, C. D., Sphyris, N., Evans, K. W., Werden, S. J., Guo, W. & Mani, S. A.  
1337 Epithelial-mesenchymal transition and cancer stem cells: a dangerously dynamic  
1338 duo in breast cancer progression. *Breast Cancer Research* **13**, 1-10 (2011).
- 1339 4 Bollong, M. J., Pietilä, M., Pearson, A. D., Sarkar, T. R., Ahmad, I., Soundararajan,  
1340 R., Lyssiottis, C. A., Mani, S. A., Schultz, P. G. & Lairson, L. L. A vimentin binding  
1341 small molecule leads to mitotic disruption in mesenchymal cancers. *Proceedings  
1342 of the National Academy of Sciences* **114**, E9903-E9912,  
1343 doi:10.1073/pnas.1716009114 (2017).
- 1344 5 Firulli, A. B., McFadden, D. G., Lin, Q., Srivastava, D. & Olson, E. N. Heart and  
1345 extra-embryonic mesodermal defects in mouse embryos lacking the bHLH  
1346 transcription factor Hand1. *Nature genetics* **18**, 266-270 (1998).
- 1347 6 Morikawa, Y. & Cserjesi, P. Extra-embryonic vasculature development is regulated  
1348 by the transcription factor HAND1. *Development (Cambridge, England)* **131**, 2195-  
1349 2204, doi:10.1242/dev.01091 (2004).
- 1350 7 Barbosa, A. C., Funato, N., Chapman, S., McKee, M. D., Richardson, J. A., Olson,  
1351 E. N. & Yanagisawa, H. Hand transcription factors cooperatively regulate

- 1352 development of the distal midline mesenchyme. *Dev Biol* **310**, 154-168,  
1353 doi:10.1016/j.ydbio.2007.07.036 (2007).
- 1354 8 Plachov, D., Chowdhury, K., Walther, C., Simon, D., Guenet, J.-L. & Gruss, P.  
1355 Pax8, a murine paired box gene expressed in the developing excretory system  
1356 and thyroid gland. *Development (Cambridge, England)* **110**, 643-651 (1990).
- 1357 9 Pfeffer, P. L., Gerster, T., Lun, K., Brand, M. & Busslinger, M. Characterization of  
1358 three novel members of the zebrafish Pax2/5/8 family: dependency of Pax5 and  
1359 Pax8 expression on the Pax2. 1 (noi) function. *Development (Cambridge, England)*  
1360 **125**, 3063-3074 (1998).
- 1361 10 Mansouri, A., Chowdhury, K. & Gruss, P. Follicular cells of the thyroid gland require  
1362 Pax8 gene function. *Nature genetics* **19**, 87-90 (1998).
- 1363 11 Bouchard, M., Souabni, A., Mandler, M., Neubüser, A. & Busslinger, M. Nephric  
1364 lineage specification by Pax2 and Pax8. *Genes & development* **16**, 2958-2970  
1365 (2002).
- 1366 12 Vincent, C., Kalatzis, V., Abdelhak, S., Chaïb, H., Compain, S., Helias, J.,  
1367 Vaneecloo, F.-M. & Petit, C. BOR and BO syndromes are allelic defects of EYA1.  
1368 *European Journal of Human Genetics* **5**, 242-246 (1997).
- 1369 13 Kumar, S., Kimberling, W. J., Weston, M. D., Schaefer, B. G., Berg, M. A., Marres,  
1370 H. A. & Cremers, C. W. Identification of three novel mutations in human EYA1  
1371 protein associated with branchio-oto-renal syndrome. *Human mutation* **11**, 443-  
1372 449 (1998).

- 1373 14 Xu, P.-X., Adams, J., Peters, H., Brown, M. C., Heaney, S. & Maas, R. Eya1-  
1374 deficient mice lack ears and kidneys and show abnormal apoptosis of organ  
1375 primordia. *Nature Genetics* **23**, 113-117, doi:10.1038/12722 (1999).
- 1376 15 Patterson, L. T. & Potter, S. S. Atlas of Hox gene expression in the developing  
1377 kidney. *Developmental Dynamics* **229**, 771-779,  
1378 doi:<https://doi.org/10.1002/dvdy.10474> (2004).
- 1379 16 Rojek, A., Füchtbauer, E.-M., Kwon, T.-H., Frøkiær, J. & Nielsen, S. Severe urinary  
1380 concentrating defect in renal collecting duct-selective AQP2 conditional-knockout  
1381 mice. *Proceedings of the National Academy of Sciences* **103**, 6037-6042,  
1382 doi:10.1073/pnas.0511324103 (2006).
- 1383 17 Liu, X., Li, Y., Wang, L., Zhao, Q., Lu, X., Huang, J., Fan, Z. & Gu, D. The INSIG1  
1384 gene, not the INSIG2 gene, associated with coronary heart disease: tagSNPs and  
1385 haplotype-based association study. The Beijing Atherosclerosis Study. *Thromb*  
1386 *Haemost* **100**, 886-892 (2008).
- 1387 18 Shimomura, Y., Harada, M., Goto, M., Sugo, T., Matsumoto, Y., Abe, M.,  
1388 Watanabe, T., Asami, T., Kitada, C., Mori, M., Onda, H. & Fujino, M. Identification  
1389 of neuropeptide W as the endogenous ligand for orphan G-protein-coupled  
1390 receptors GPR7 and GPR8. *J Biol Chem* **277**, 35826-35832,  
1391 doi:10.1074/jbc.M205337200 (2002).
- 1392 19 Tirado-Hurtado, I., Fajardo, W. & Pinto, J. A. DNA Damage Inducible Transcript 4  
1393 Gene: The Switch of the Metabolism as Potential Target in Cancer. *Frontiers in*  
1394 *Oncology* **8**, doi:10.3389/fonc.2018.00106 (2018).

- 1395 20 Kowalczyk, M. S., Tirosh, I., Heckl, D., Rao, T. N., Dixit, A., Haas, B. J., Schneider,  
1396 R. K., Wagers, A. J., Ebert, B. L. & Regev, A. Single-cell RNA-seq reveals changes  
1397 in cell cycle and differentiation programs upon aging of hematopoietic stem cells.  
1398 *Genome research* **25**, 1860-1872 (2015).
- 1399 21 Subramanian, A., Sidhom, E.-H., Emani, M., Vernon, K., Sahakian, N., Zhou, Y.,  
1400 Kost-Alimova, M., Slyper, M., Waldman, J., Dionne, D., Nguyen, L. T., Weins, A.,  
1401 Marshall, J. L., Rosenblatt-Rosen, O., Regev, A. & Greka, A. Single cell census of  
1402 human kidney organoids shows reproducibility and diminished off-target cells after  
1403 transplantation. *Nature Communications* **10**, 5462, doi:10.1038/s41467-019-  
1404 13382-0 (2019).
- 1405 22 Low, J. H., Li, P., Chew, E. G. Y., Zhou, B., Suzuki, K., Zhang, T., Lian, M. M., Liu,  
1406 M., Aizawa, E. & Esteban, C. R. Generation of human PSC-derived kidney  
1407 organoids with patterned nephron segments and a de novo vascular network. *Cell*  
1408 *Stem Cell* **25**, 373-387. e379 (2019).
- 1409 23 Knapp, K. M., Jenkins, D. E., Sullivan, R., Harms, F. L., von Elsner, L., Ockeloen,  
1410 C. W., de Munnik, S., Bongers, E. M. H. F., Murray, J., Pachter, N., Denecke, J.,  
1411 Kutsche, K. & Bicknell, L. S. MCM complex members MCM3 and MCM7 are  
1412 associated with a phenotypic spectrum from Meier-Gorlin syndrome to  
1413 lipodystrophy and adrenal insufficiency. *European Journal of Human Genetics*,  
1414 doi:10.1038/s41431-021-00839-4 (2021).
- 1415 24 Miki, H., Setou, M., Kaneshiro, K. & Hirokawa, N. All kinesin superfamily protein,  
1416 KIF, genes in mouse and human. *Proceedings of the National Academy of*  
1417 *Sciences* **98**, 7004-7011, doi:10.1073/pnas.111145398 (2001).

- 1418 25 Lim, Y. W., James, D., Huang, J. & Lee, M. The Emerging Role of the RNA-Binding  
1419 Protein SFPQ in Neuronal Function and Neurodegeneration. *International journal*  
1420 *of molecular sciences* **21**, doi:10.3390/ijms21197151 (2020).
- 1421 26 Chen, E. B., Qin, X., Peng, K., Li, Q., Tang, C., Wei, Y. C., Yu, S., Gan, L. & Liu,  
1422 T. S. HnRNPR-CCNB1/CENPF axis contributes to gastric cancer proliferation and  
1423 metastasis. *Aging (Albany NY)* **11**, 7473-7491, doi:10.18632/aging.102254 (2019).
- 1424 27 Fukuda, A., Nakadai, T., Shimada, M. & Hisatake, K. Heterogeneous nuclear  
1425 ribonucleoprotein R enhances transcription from the naturally configured c-fos  
1426 promoter in vitro. *J Biol Chem* **284**, 23472-23480, doi:10.1074/jbc.M109.013656  
1427 (2009).
- 1428 28 Bernstein, H. G., Stricker, R., Dobrowolny, H., Trübner, K., Bogerts, B. & Reiser,  
1429 G. Histochemical evidence for wide expression of the metalloendopeptidase  
1430 nardilysin in human brain neurons. *Neuroscience* **146**, 1513-1523,  
1431 doi:10.1016/j.neuroscience.2007.02.057 (2007).
- 1432 29 Bertola, L. D., Ott, E. B., Griepsma, S., Vonk, F. J. & Bagowski, C. P.  
1433 Developmental expression of the alpha-skeletal actin gene. *BMC evolutionary*  
1434 *biology* **8**, 166-166, doi:10.1186/1471-2148-8-166 (2008).
- 1435 30 Kim, H.-R., Kwon, M.-S., Lee, S., Mun, Y., Lee, K.-S., Kim, C.-H., Na, B.-R., Kim,  
1436 B. N. R., Piragyte, I., Lee, H.-S., Jun, Y., Jin, M. S., Hyun, Y.-M., Jung, H. S., Mun,  
1437 J. Y. & Jun, C.-D. TAGLN2 polymerizes G-actin in a low ionic state but blocks  
1438 Arp2/3-nucleated actin branching in physiological conditions. *Scientific Reports* **8**,  
1439 5503, doi:10.1038/s41598-018-23816-2 (2018).



- 1440 31 Shen, K., Gamberdinger, M., Chan, R., Gense, K., Martin, E. M., Sachs, N., Knight,  
1441 P. D., Schlömer, R., Calabrese, A. N., Stewart, K. L., Leiendecker, L., Baghel, A.,  
1442 Radford, S. E., Frydman, J. & Deuerling, E. Dual Role of Ribosome-Binding  
1443 Domain of NAC as a Potent Suppressor of Protein Aggregation and Aging-Related  
1444 Proteinopathies. *Mol Cell* **74**, 729-741.e727, doi:10.1016/j.molcel.2019.03.012  
1445 (2019).
- 1446 32 Allen, A., Gau, D., Francoeur, P., Sturm, J., Wang, Y., Martin, R., Maranchie, J.,  
1447 Duensing, A., Kaczorowski, A., Duensing, S., Wu, L., Lotze, M. T., Koes, D.,  
1448 Storkus, W. J. & Roy, P. Actin-binding protein profilin1 promotes aggressiveness  
1449 of clear-cell renal cell carcinoma cells. *J Biol Chem* **295**, 15636-15649,  
1450 doi:10.1074/jbc.RA120.013963 (2020).
- 1451 33 Zou, Y.-h., Li, X.-d., Zhang, Q.-h. & Liu, D.-z. RACK1 Silencing Induces Cell  
1452 Apoptosis and Inhibits Cell Proliferation in Hepatocellular Carcinoma MHCC97-H  
1453 Cells. *Pathology & Oncology Research* **24**, 101-107, doi:10.1007/s12253-017-  
1454 0214-6 (2018).
- 1455 34 Zanni, G., Barresi, S., Travaglini, L., Bernardini, L., Rizza, T., Digilio, M. C.,  
1456 Mercuri, E., Cianfarani, S., Valeriani, M., Ferraris, A., Da Sacco, L., Novelli, A.,  
1457 Valente, E. M., Dallapiccola, B. & Bertini, E. S. FGF17, a gene involved in  
1458 cerebellar development, is downregulated in a patient with Dandy-Walker  
1459 malformation carrying a de novo 8p deletion. *Neurogenetics* **12**, 241-245,  
1460 doi:10.1007/s10048-011-0283-8 (2011).
- 1461 35 Zhang, S. & Cui, W. Sox2, a key factor in the regulation of pluripotency and neural  
1462 differentiation. *World J Stem Cells* **6**, 305-311, doi:10.4252/wjsc.v6.i3.305 (2014).

- 1463 36 Concordet, J.-P. & Haeussler, M. CRISPOR: intuitive guide selection for  
1464 CRISPR/Cas9 genome editing experiments and screens. *Nucleic Acids Research*  
1465 **46**, W242-W245, doi:10.1093/nar/gky354 (2018).
- 1466 37 Yumlu, S., Stumm, J., Bashir, S., Dreyer, A.-K., Lisowski, P., Danner, E. & Kühn,  
1467 R. Gene editing and clonal isolation of human induced pluripotent stem cells using  
1468 CRISPR/Cas9. *Methods* **121-122**, 29-44,  
1469 doi:<https://doi.org/10.1016/j.ymeth.2017.05.009> (2017).
- 1470 38 Takasato, M., Er, P. X., Chiu, H. S., Maier, B., Baillie, G. J., Ferguson, C., Parton,  
1471 R. G., Wolvetang, E. J., Roost, M. S., Chuva de Sousa Lopes, S. M. & Little, M. H.  
1472 Kidney organoids from human iPS cells contain multiple lineages and model  
1473 human nephrogenesis. *Nature* **526**, 564-568, doi:10.1038/nature15695 (2015).
- 1474 39 Kim, D., Pertea, G., Trapnell, C., Pimentel, H., Kelley, R. & Salzberg, S. L.  
1475 TopHat2: accurate alignment of transcriptomes in the presence of insertions,  
1476 deletions and gene fusions. *Genome Biology* **14**, R36, doi:10.1186/gb-2013-14-4-  
1477 r36 (2013).
- 1478 40 Liao, Y., Smyth, G. K. & Shi, W. featureCounts: an efficient general purpose  
1479 program for assigning sequence reads to genomic features. *Bioinformatics*  
1480 (*Oxford, England*) **30**, 923-930, doi:10.1093/bioinformatics/btt656 (2014).
- 1481 41 Robinson, J. T., Thorvaldsdóttir, H., Winckler, W., Guttman, M., Lander, E. S.,  
1482 Getz, G. & Mesirov, J. P. Integrative genomics viewer. *Nature biotechnology* **29**,  
1483 24-26 (2011).
- 1484 42 Wagner, G. P., Kin, K. & Lynch, V. J. Measurement of mRNA abundance using  
1485 RNA-seq data: RPKM measure is inconsistent among samples. *Theory in*

1486            *biosciences = Theorie in den Biowissenschaften* **131**, 281-285,

1487            doi:10.1007/s12064-012-0162-3 (2012).

1488

1489
